# Supplementary material for: Patterns of allele frequency differences among domestic cat breeds assessed by a 63K SNP array
Source: PubMed Central journal article supplement (PMC7906347; doi:10.1371/journal.pone.0247092), 2021-02-25

*ATP7B* Copper Metabolism  
*LPAR6* Rexing

*LVRN* Tabby

*HEXB* Gangliosidosis 2  
*ARSB* Mucopolysaccharidosis VI

*FXII* Factor XII Deficiency

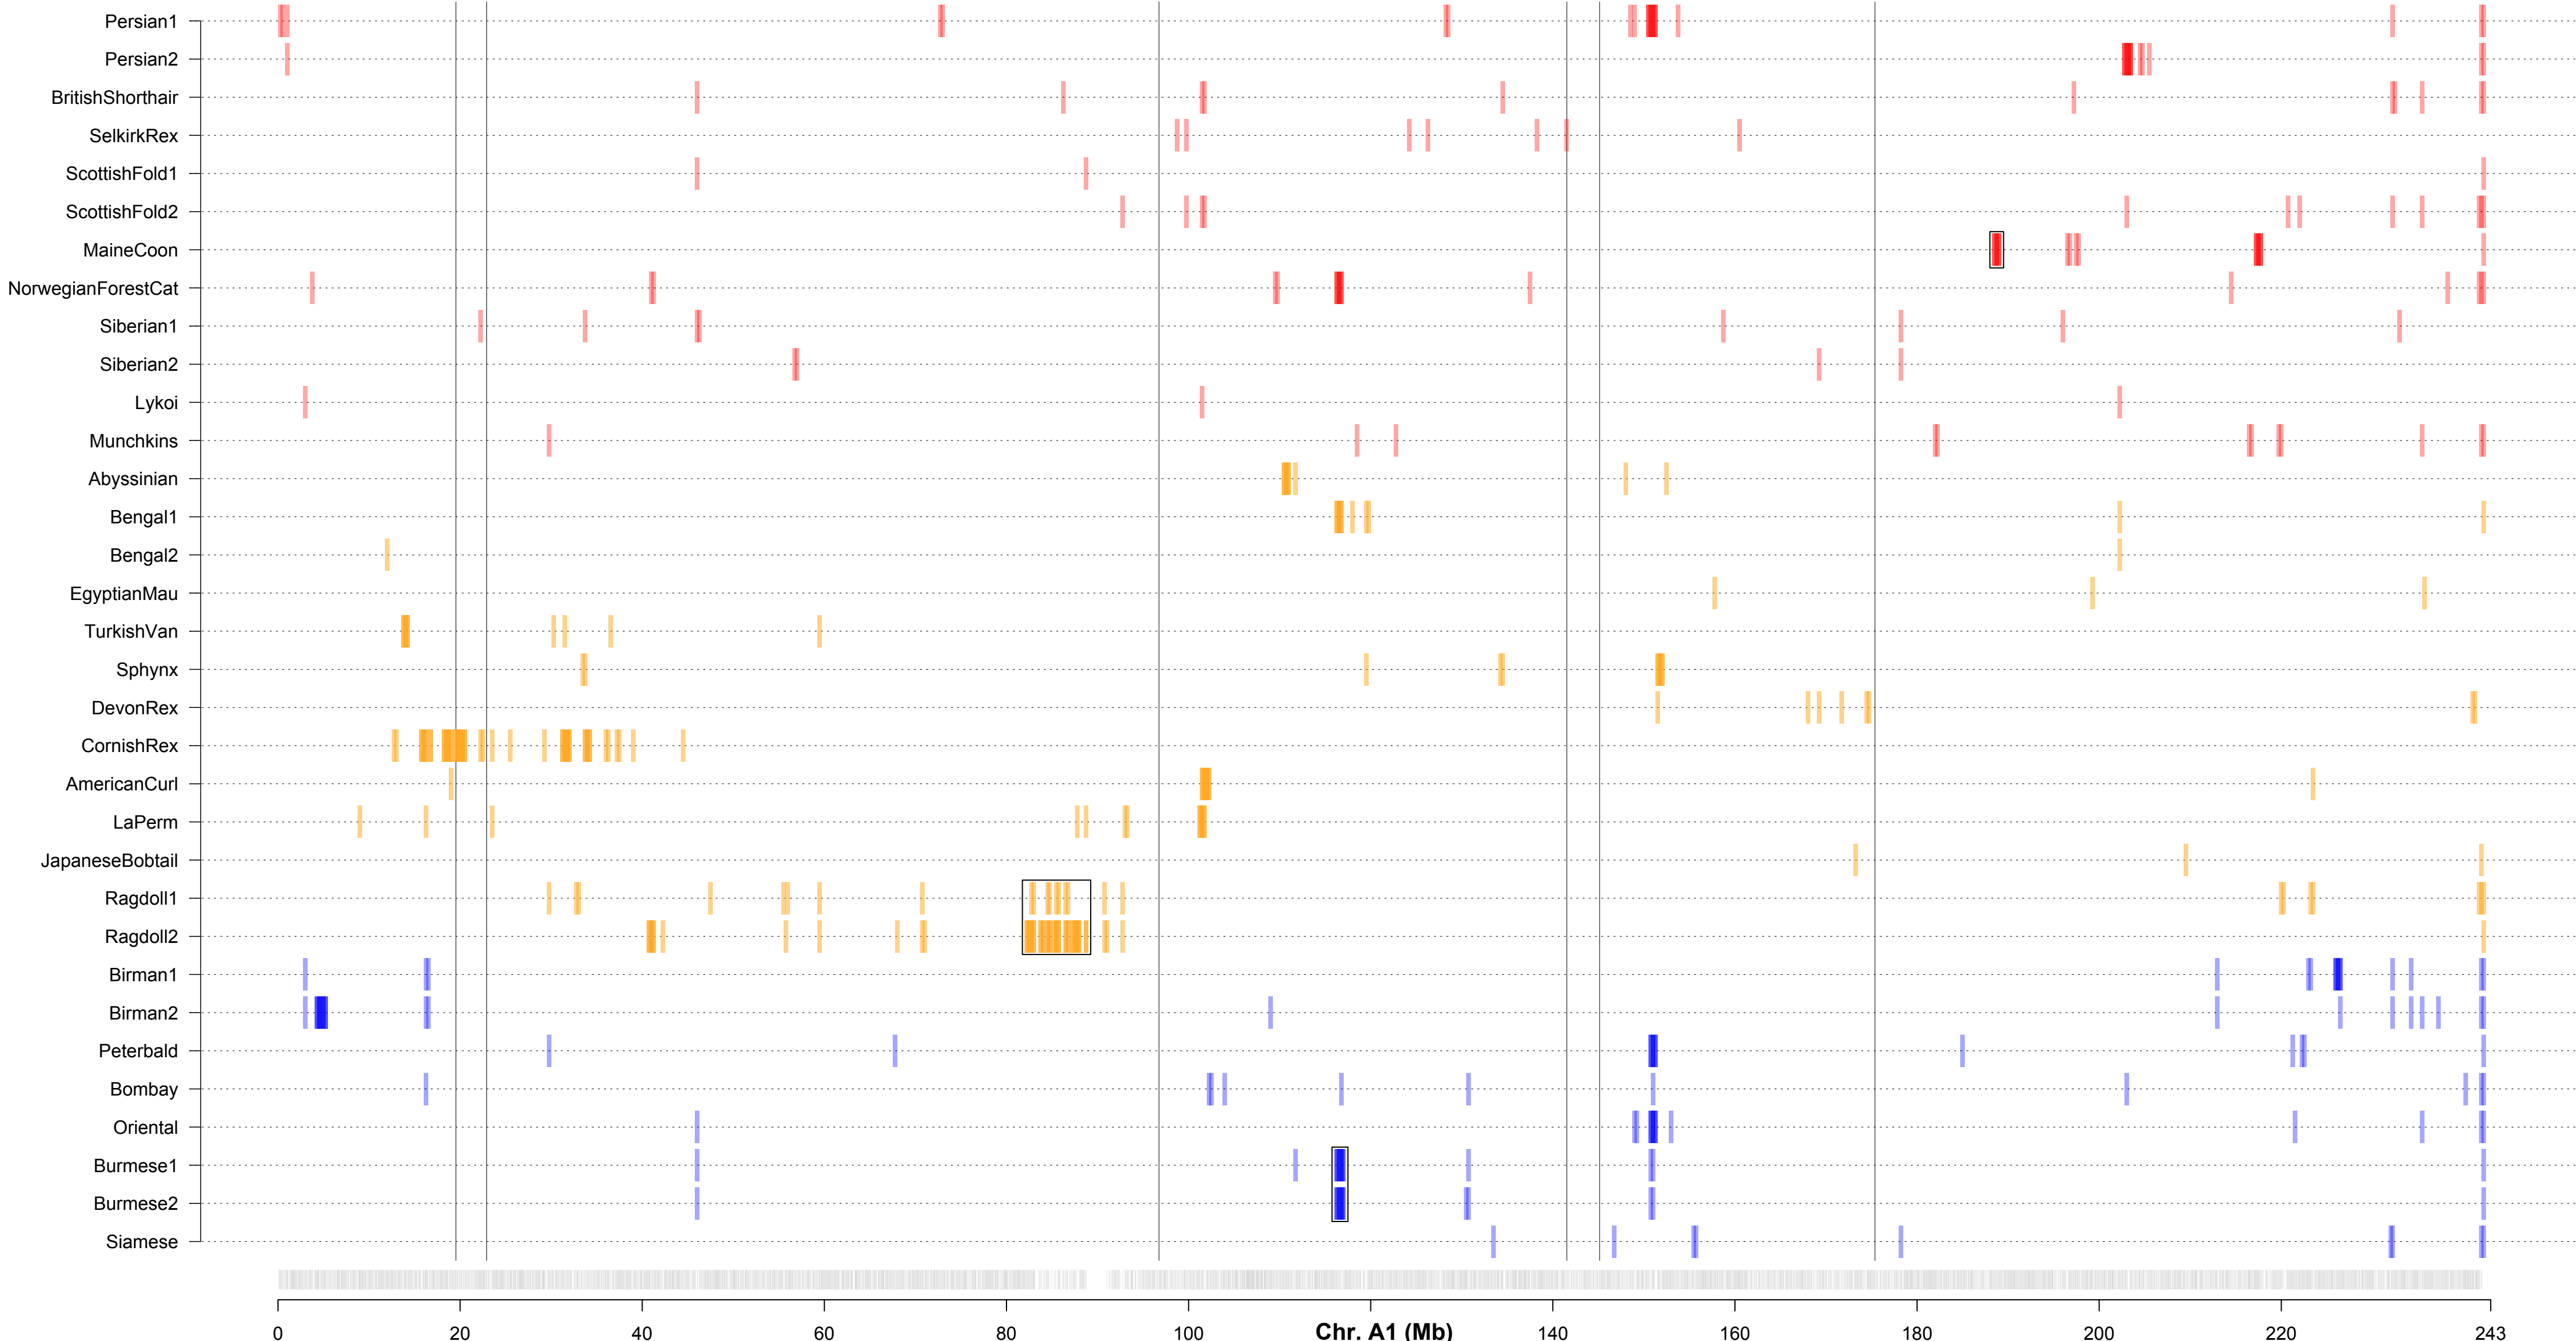



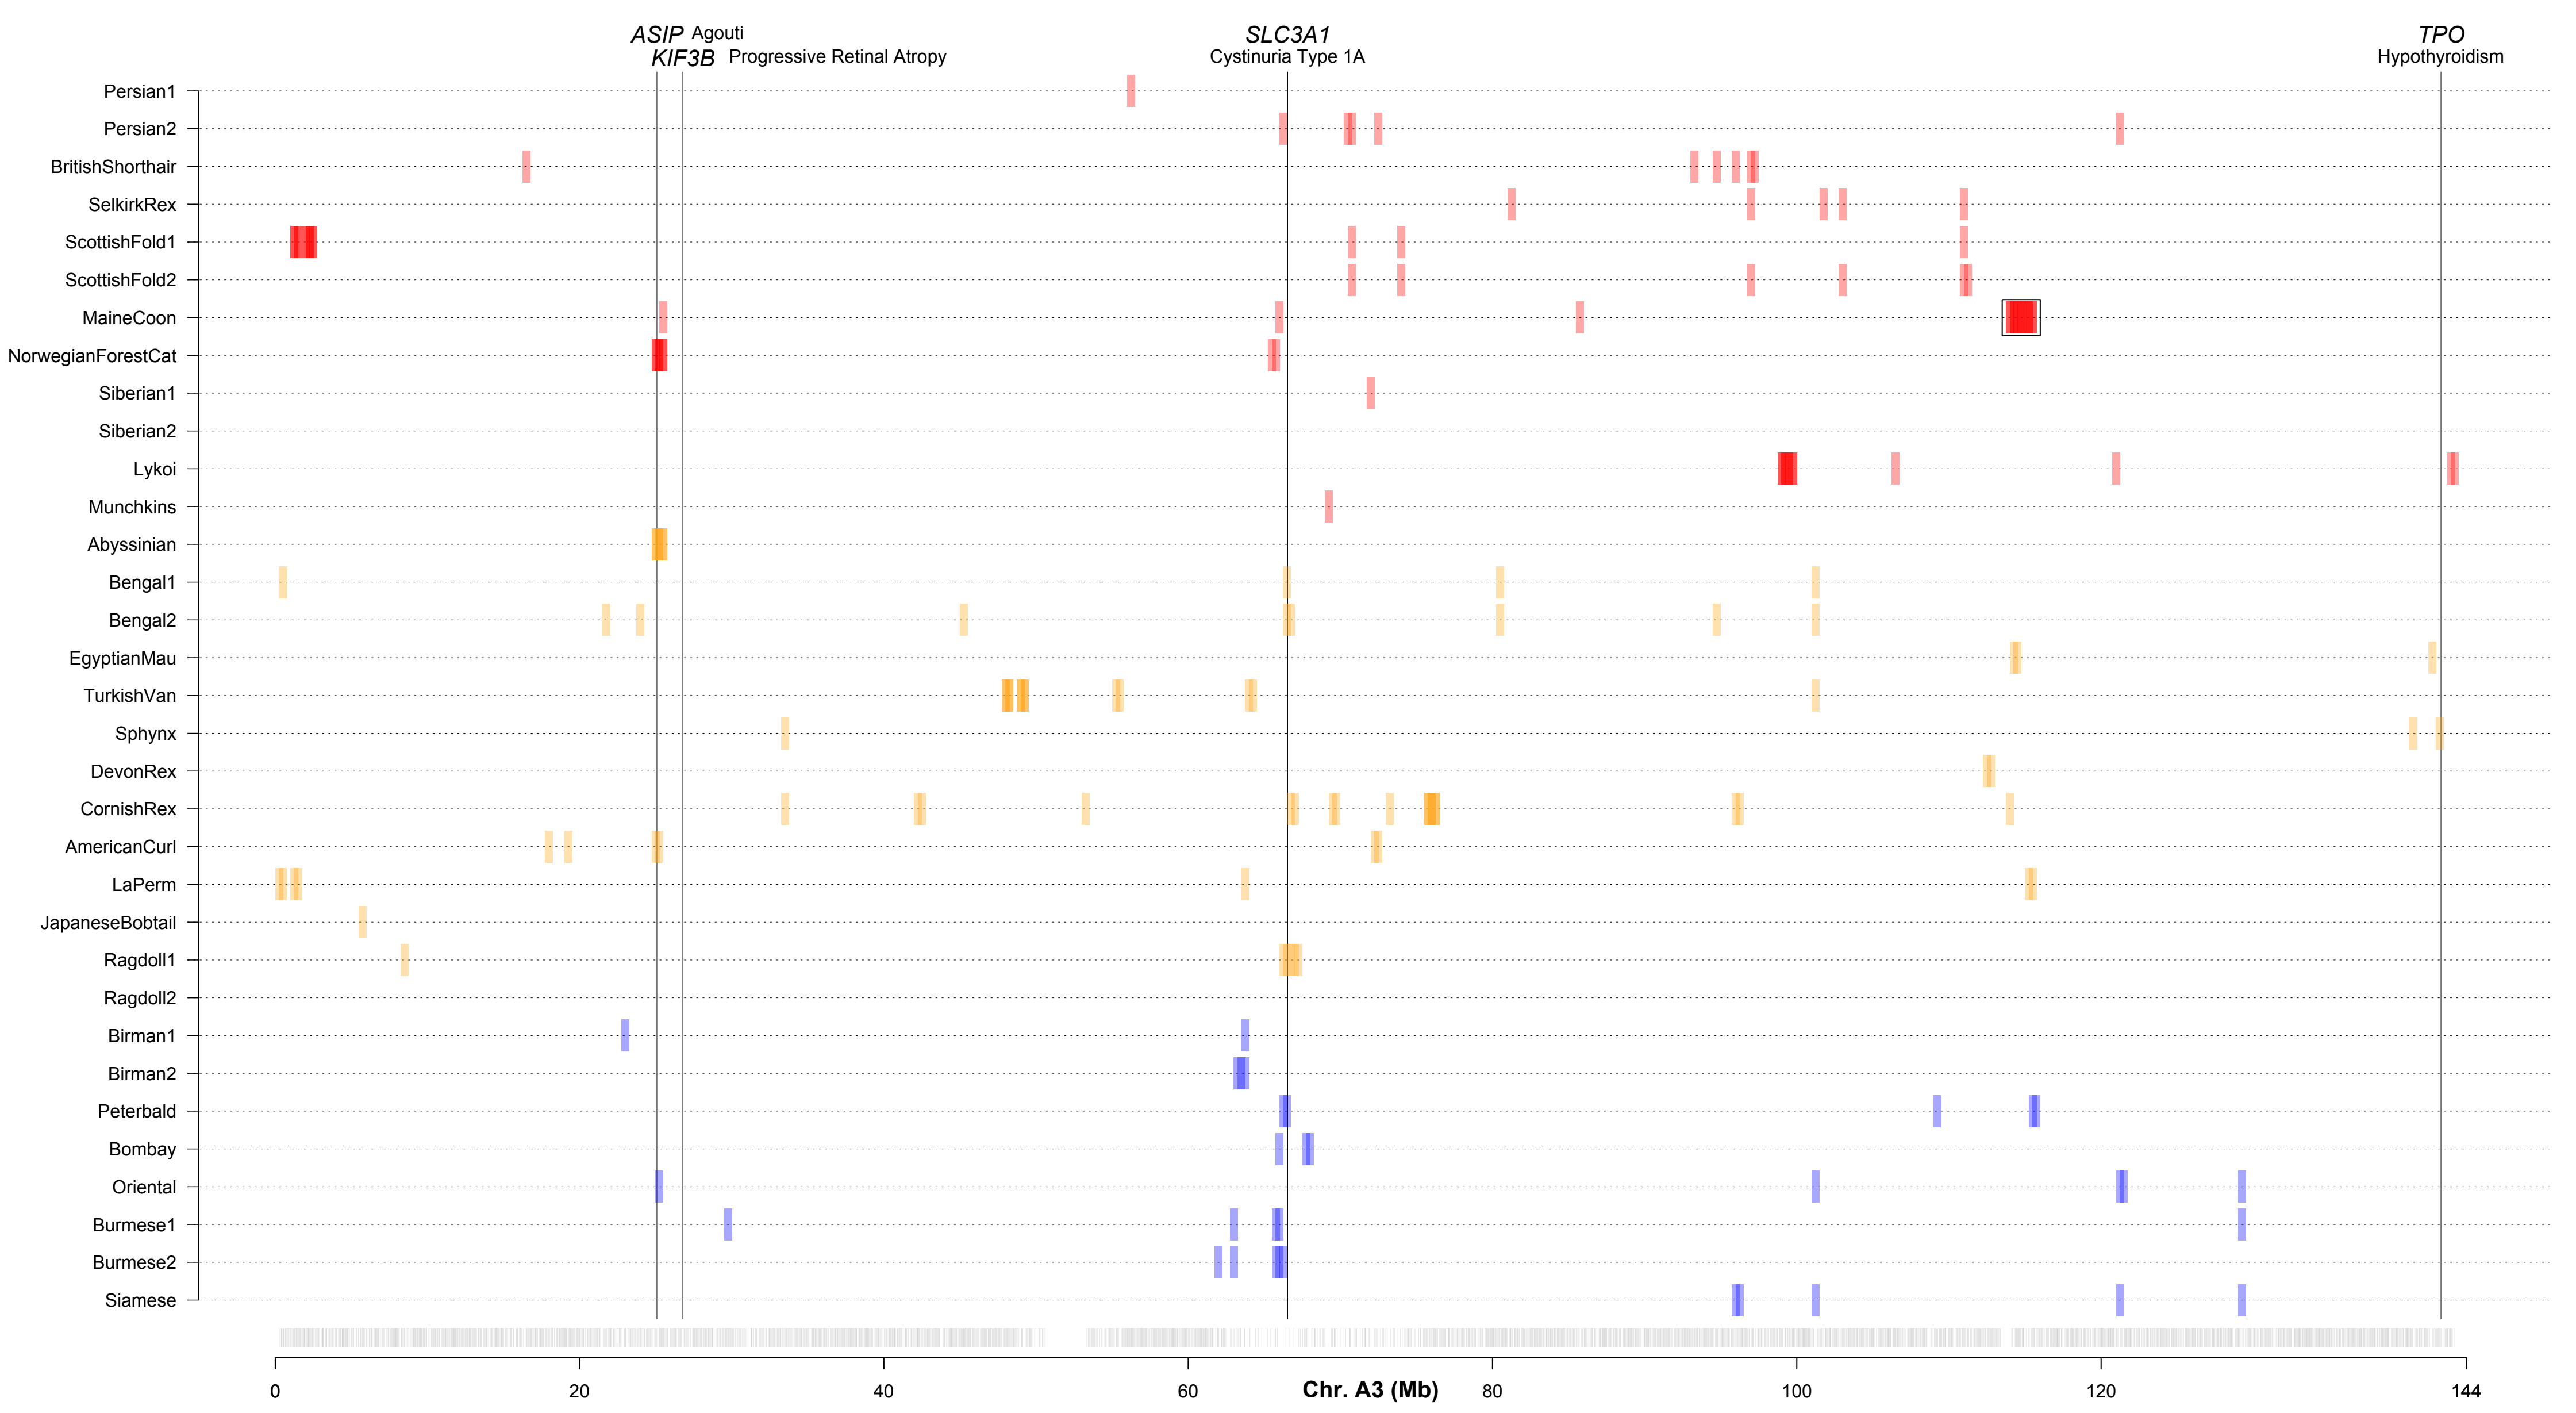

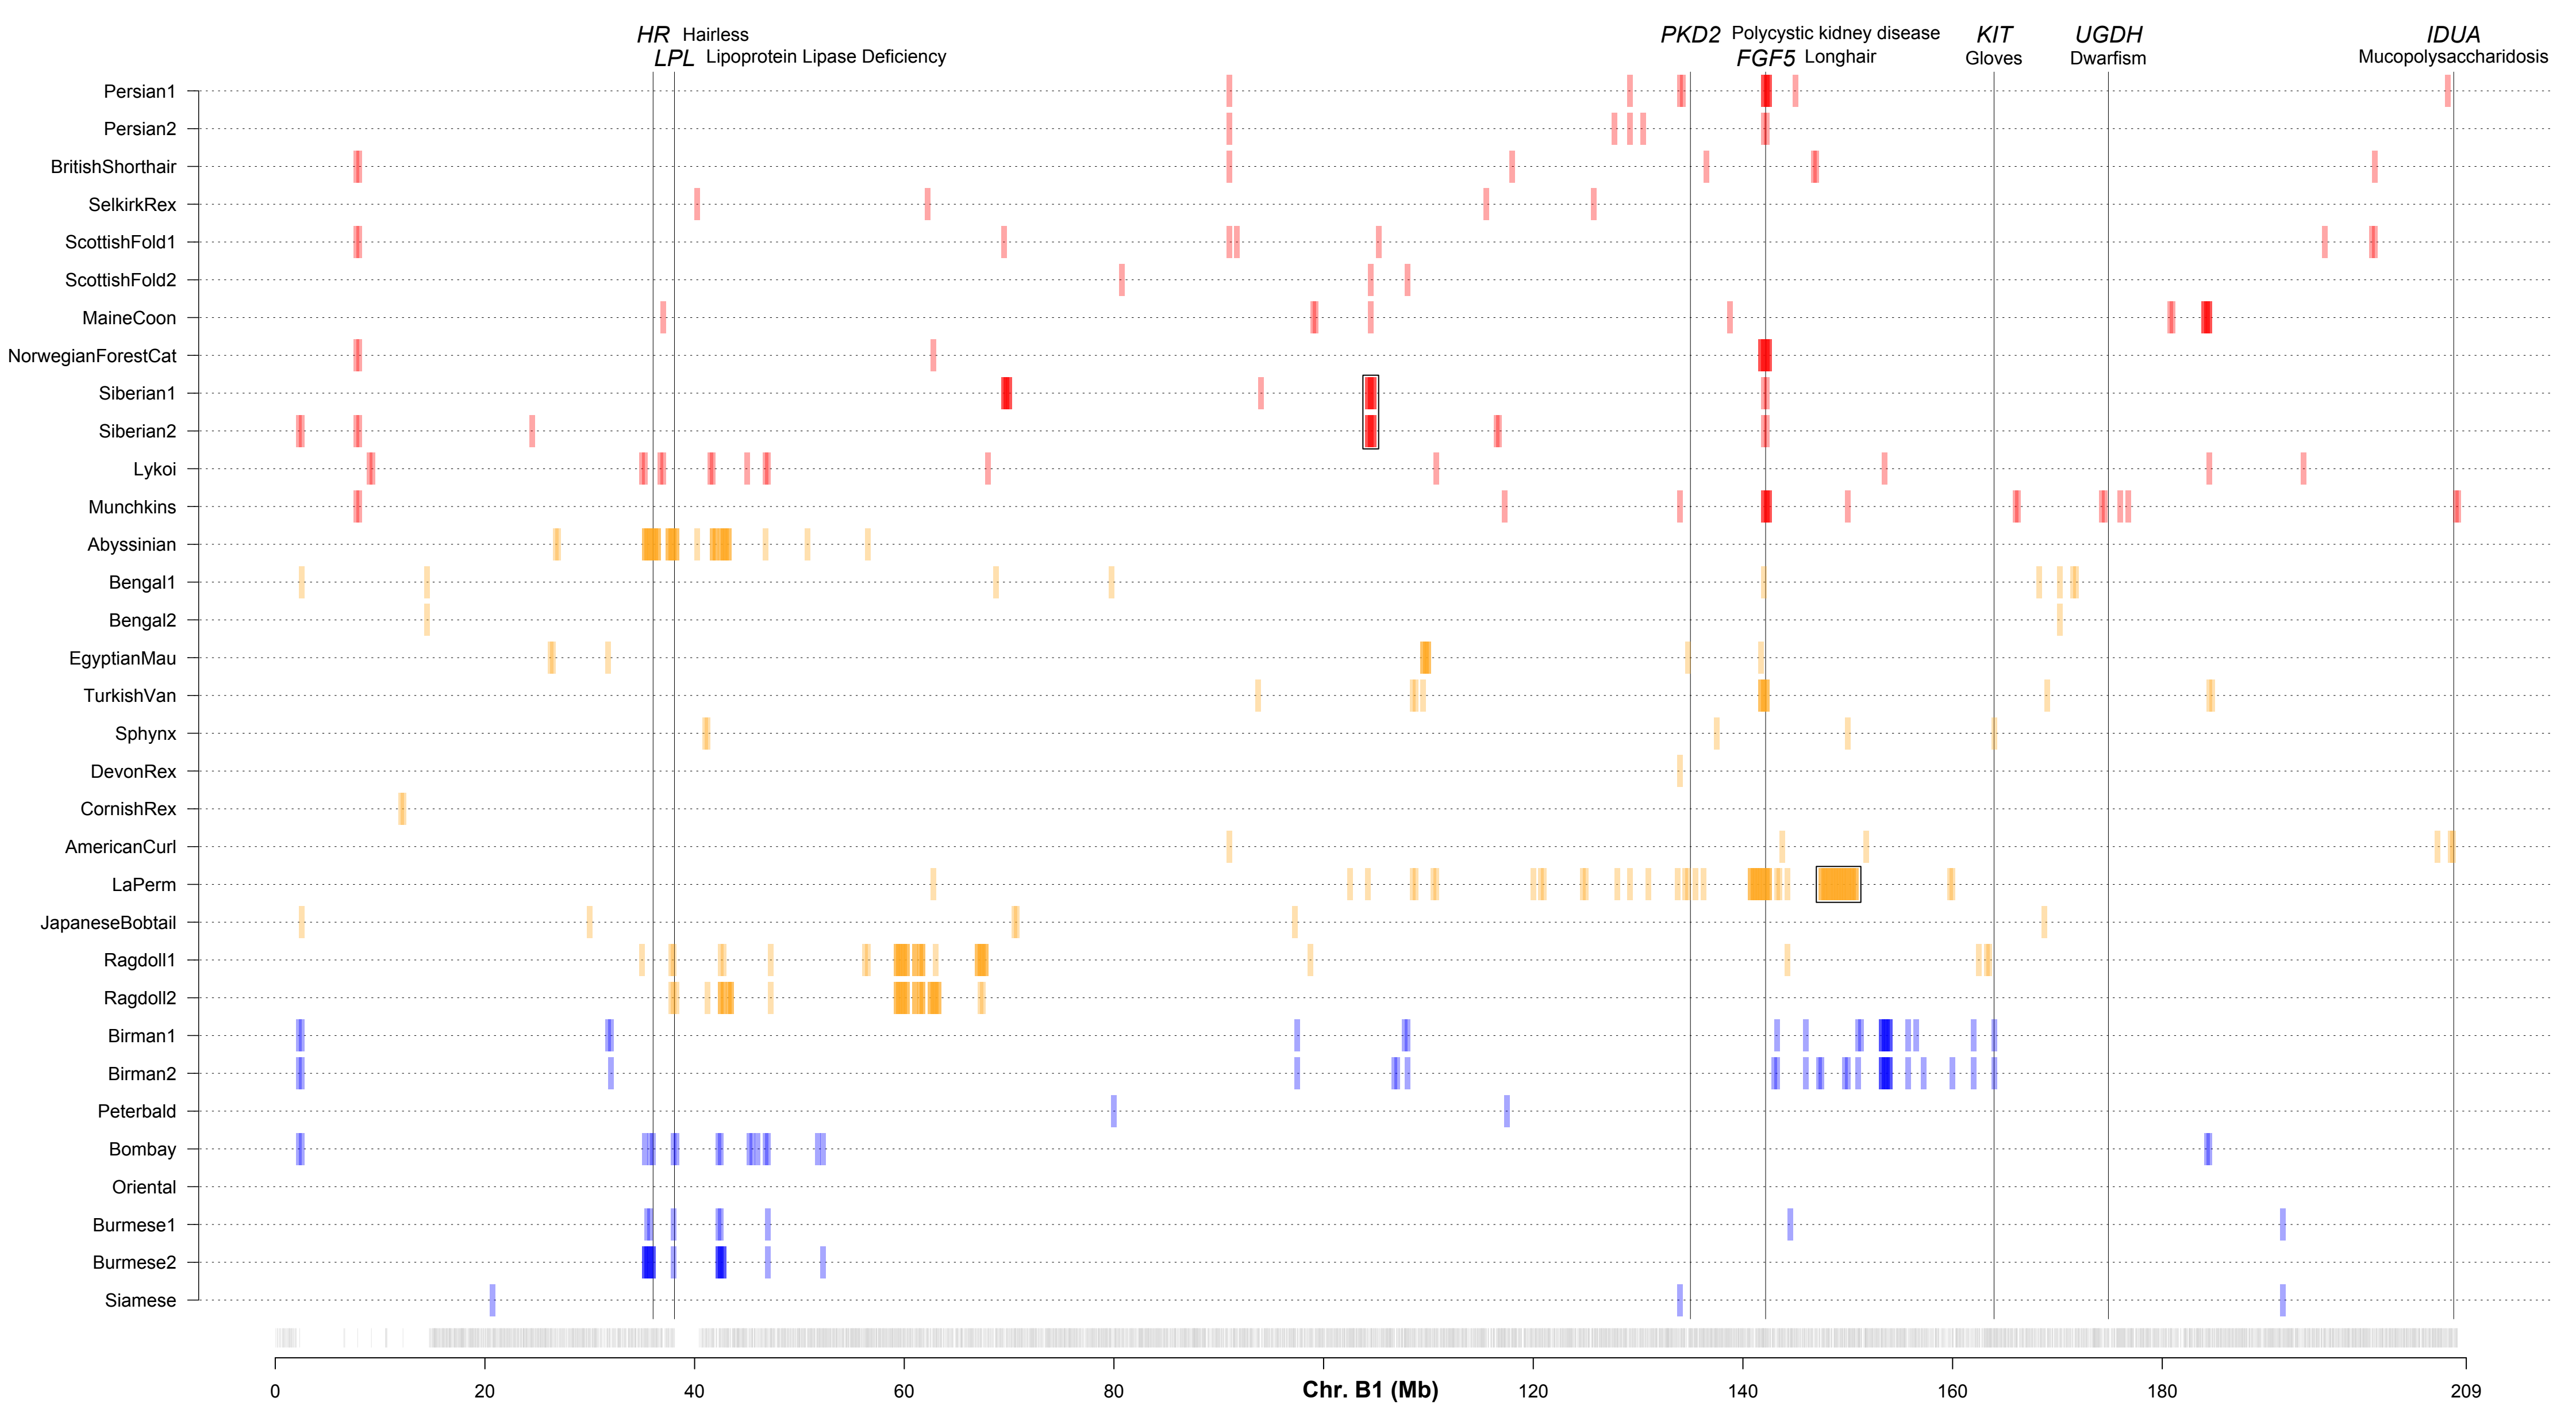

*CMAH*  
Blood Group ABC

*GPRC6A*  
Amyloidosis

*SERAC1* *TBOX*  
Deafness Tailless

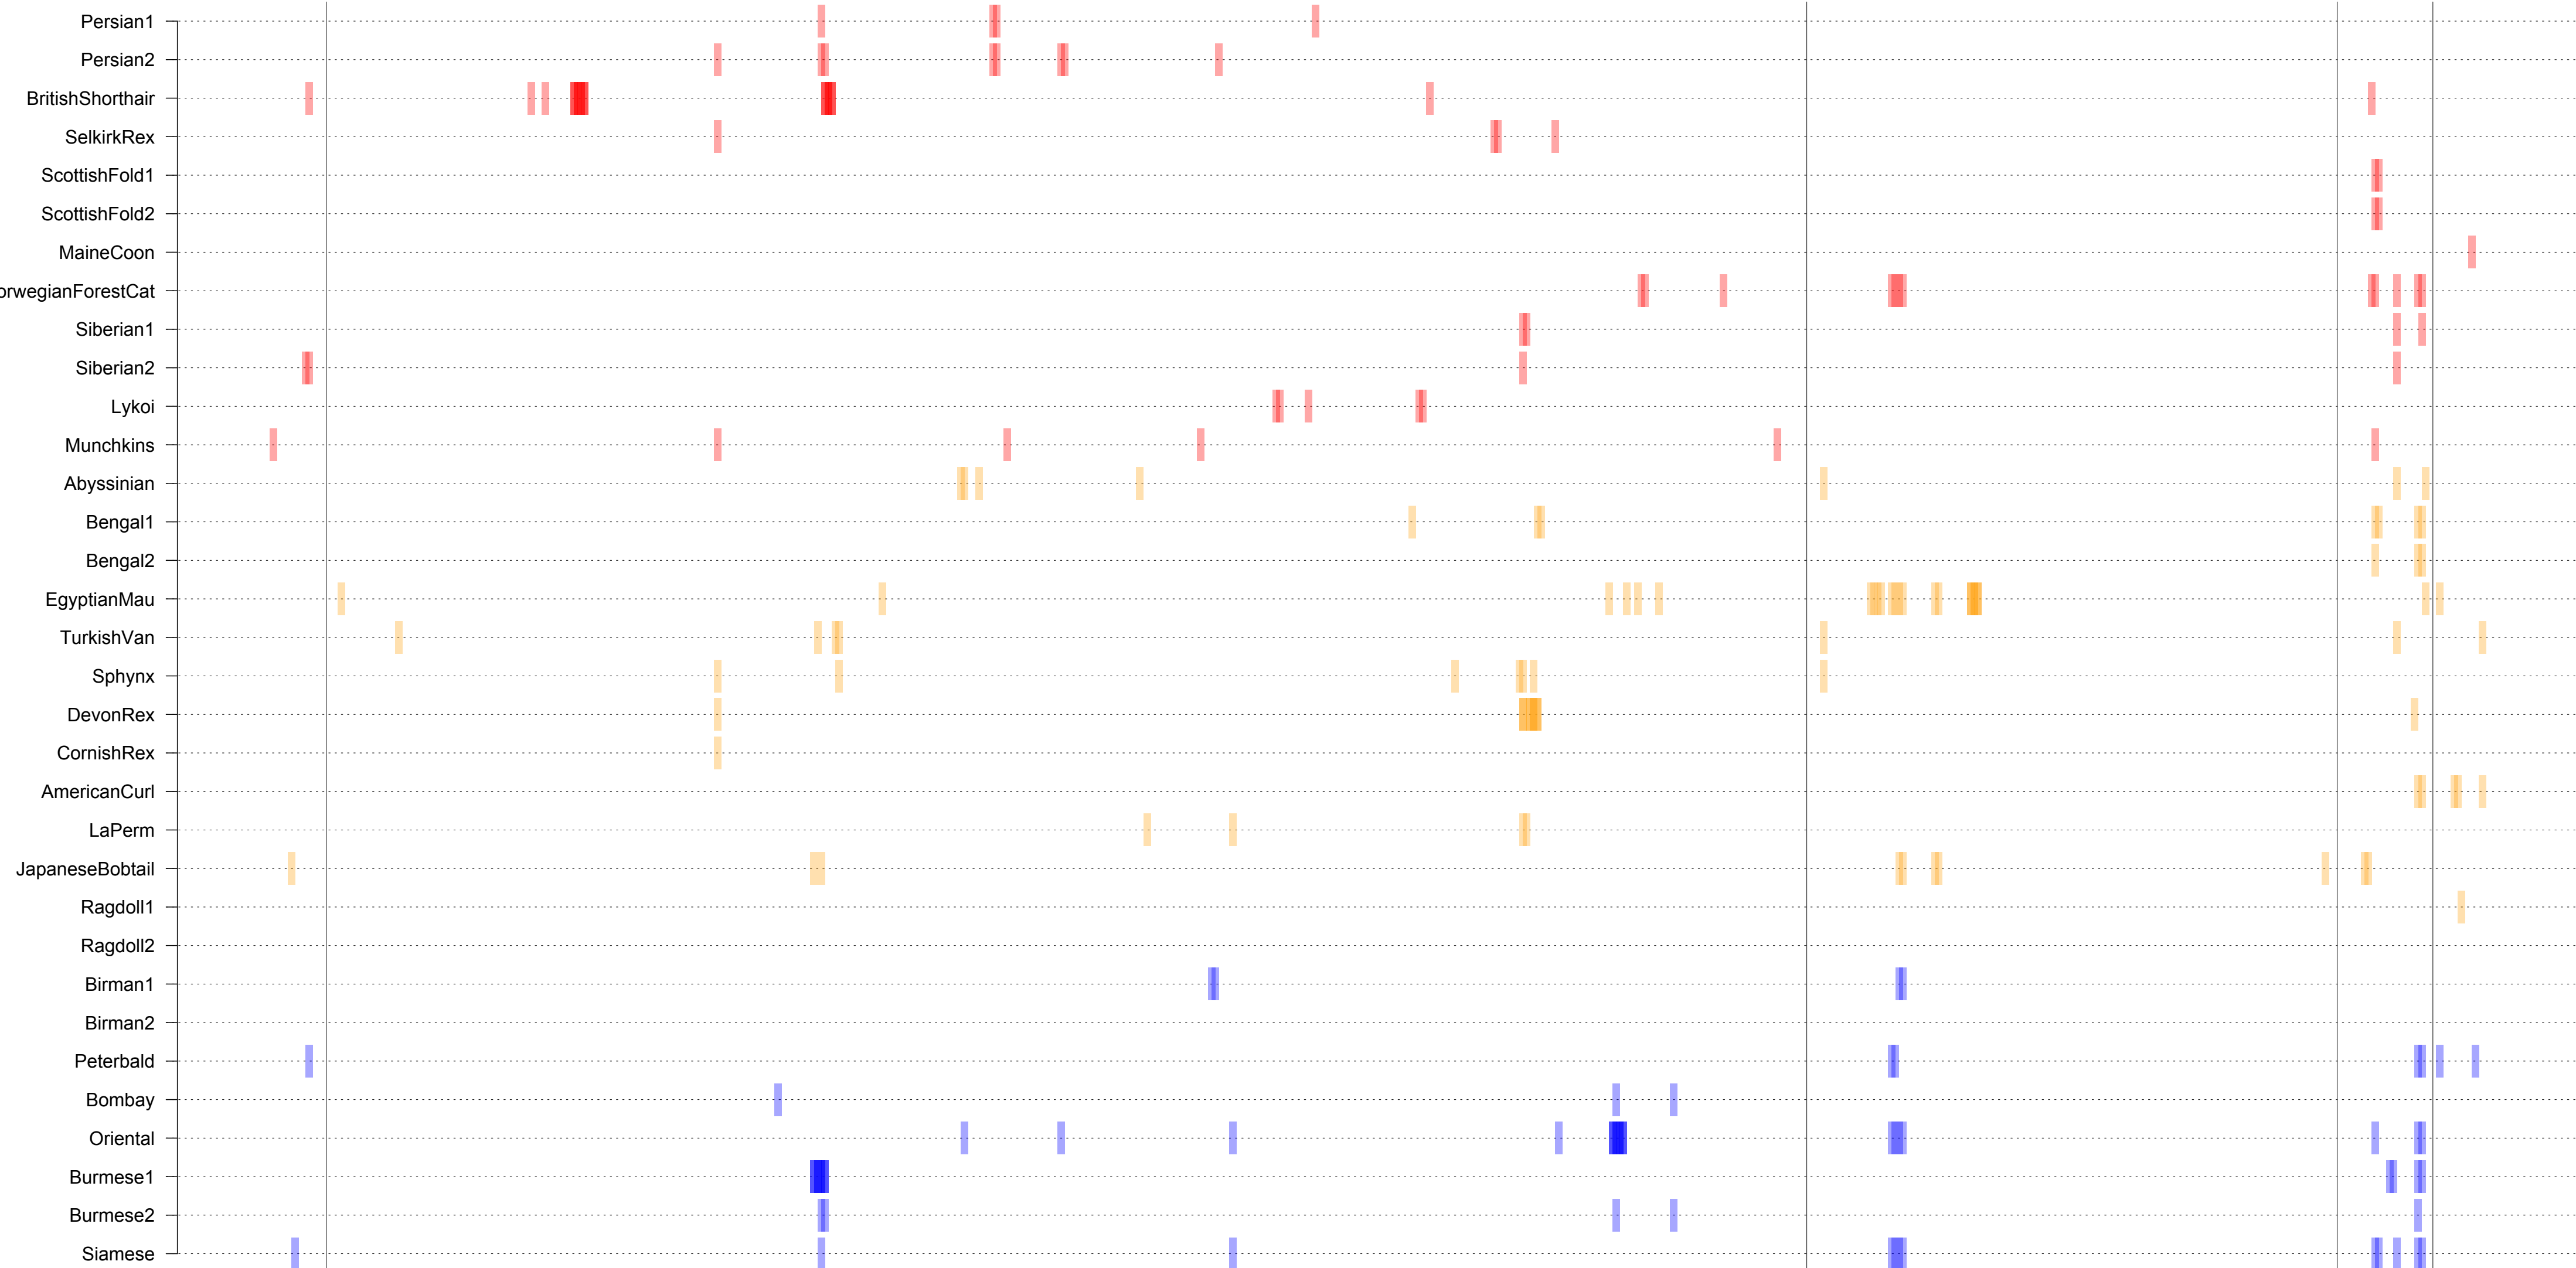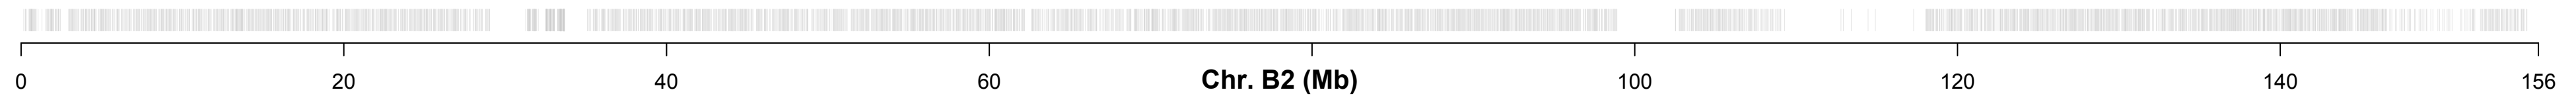

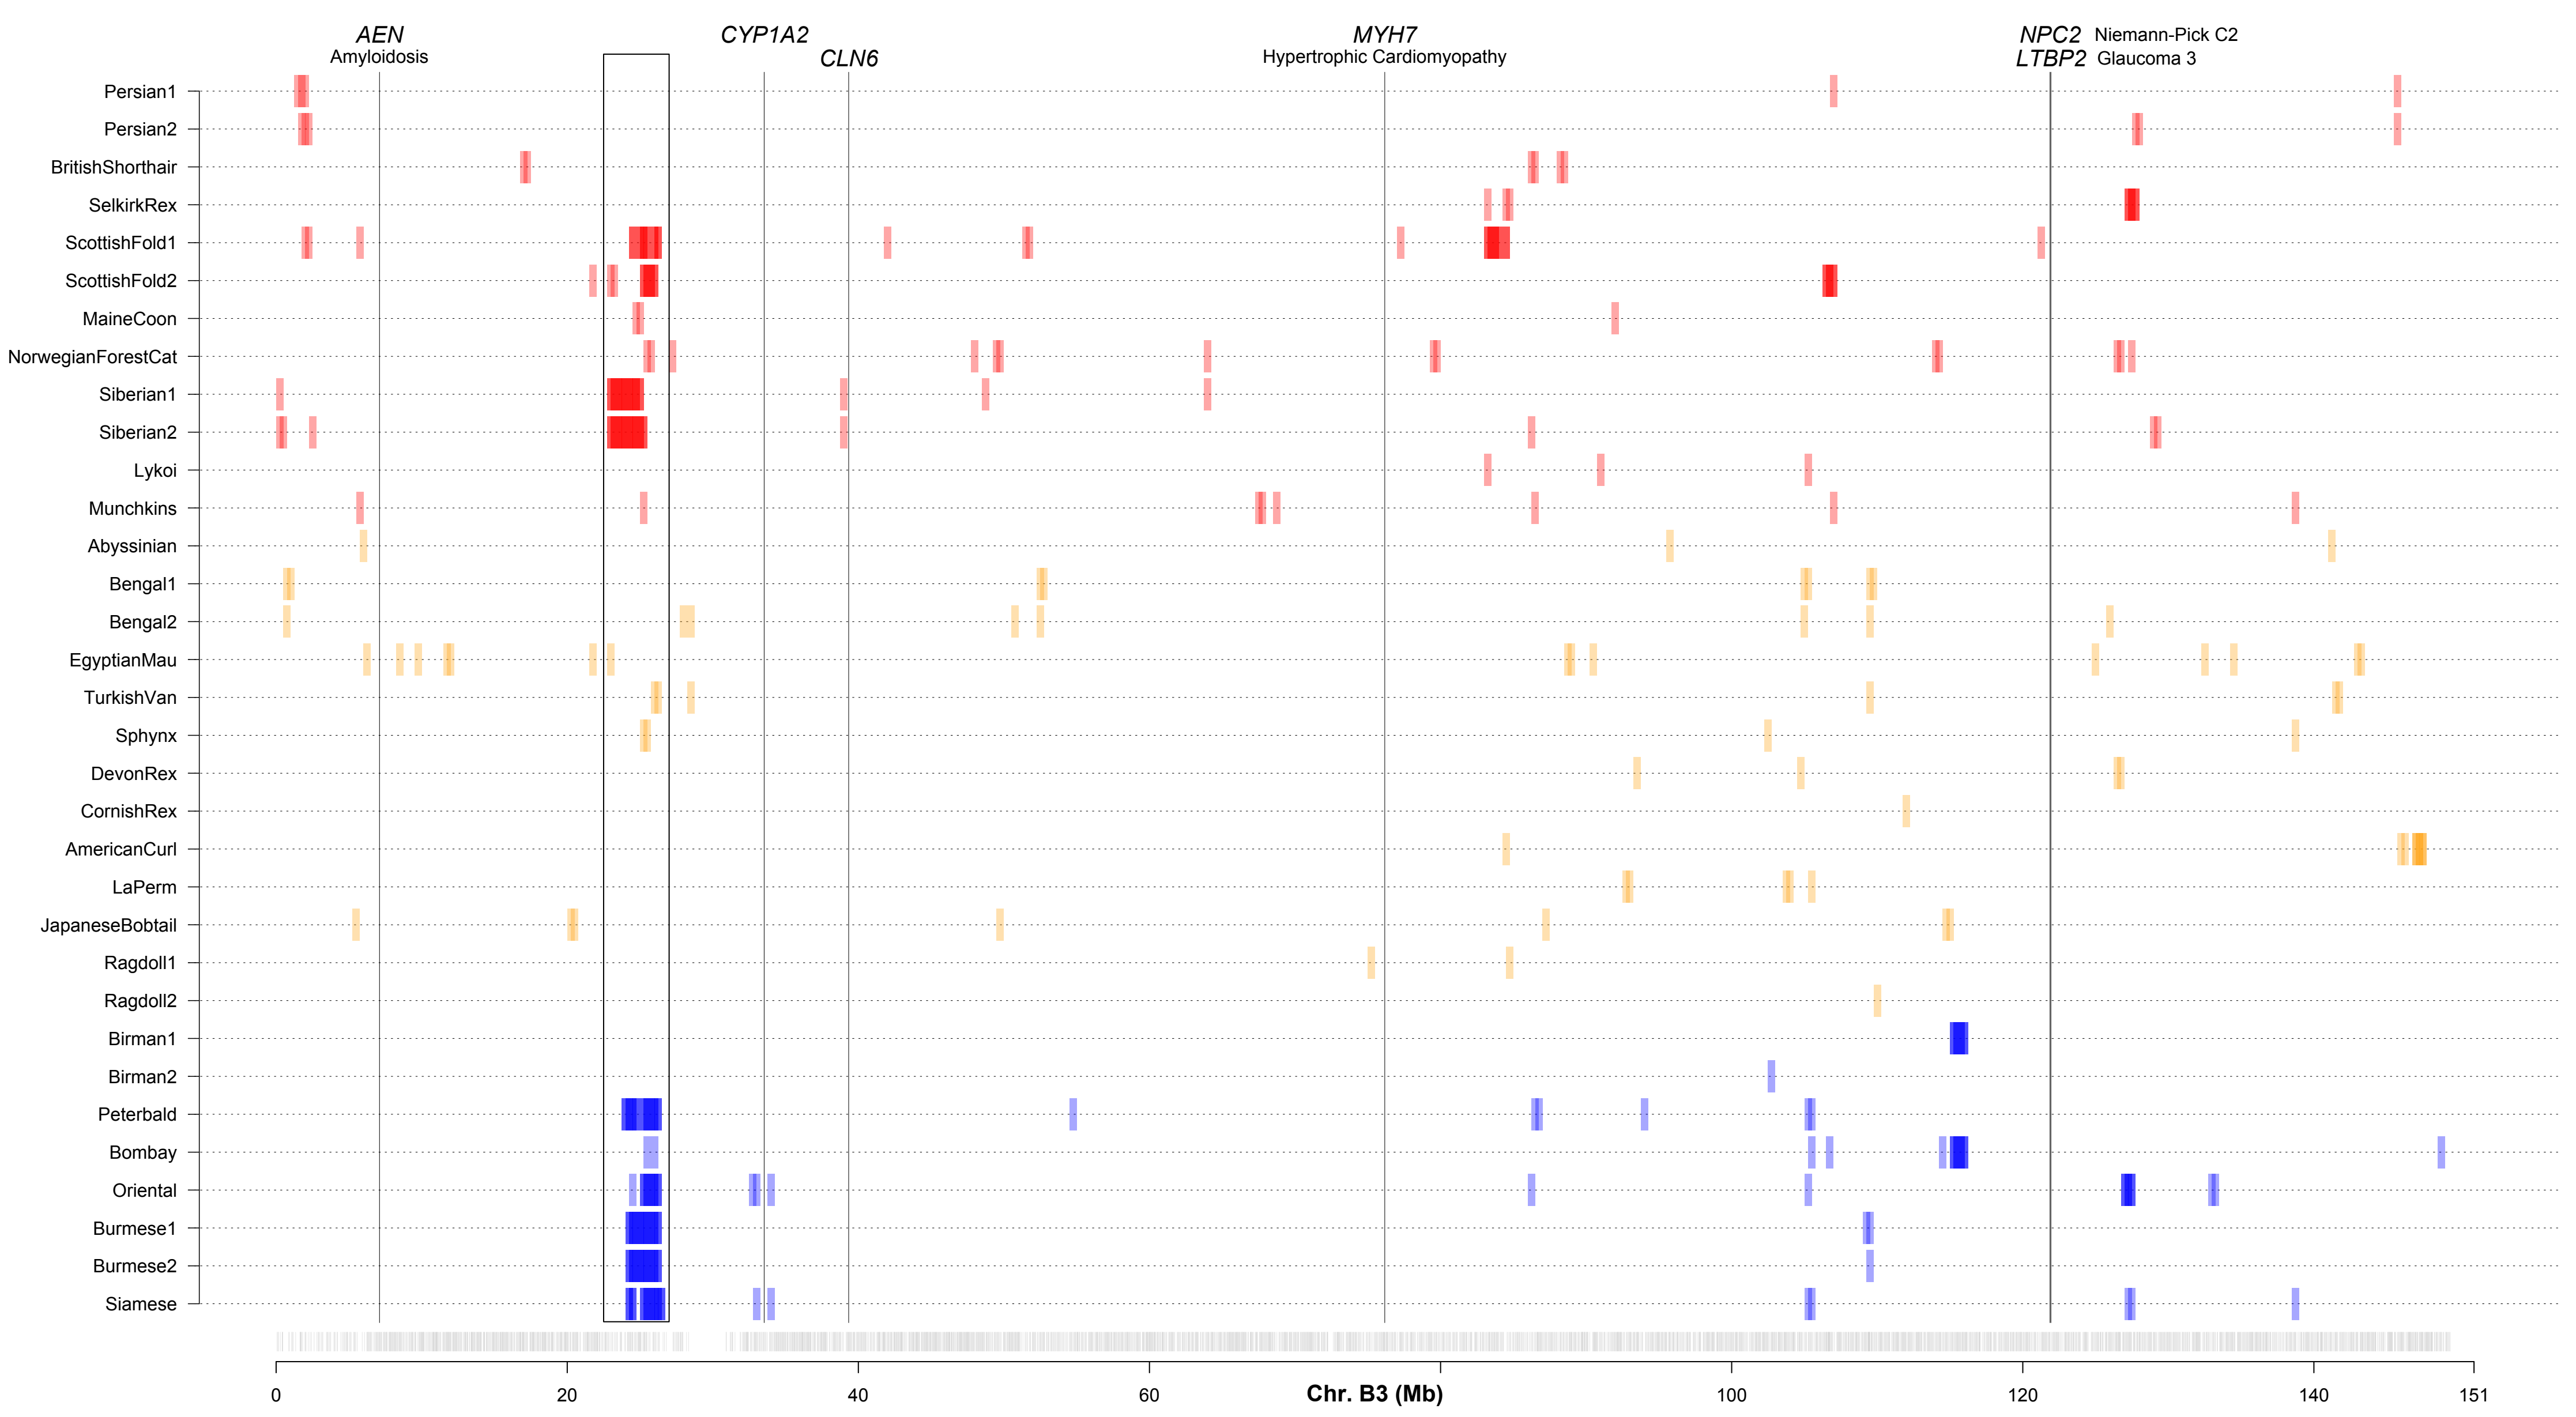

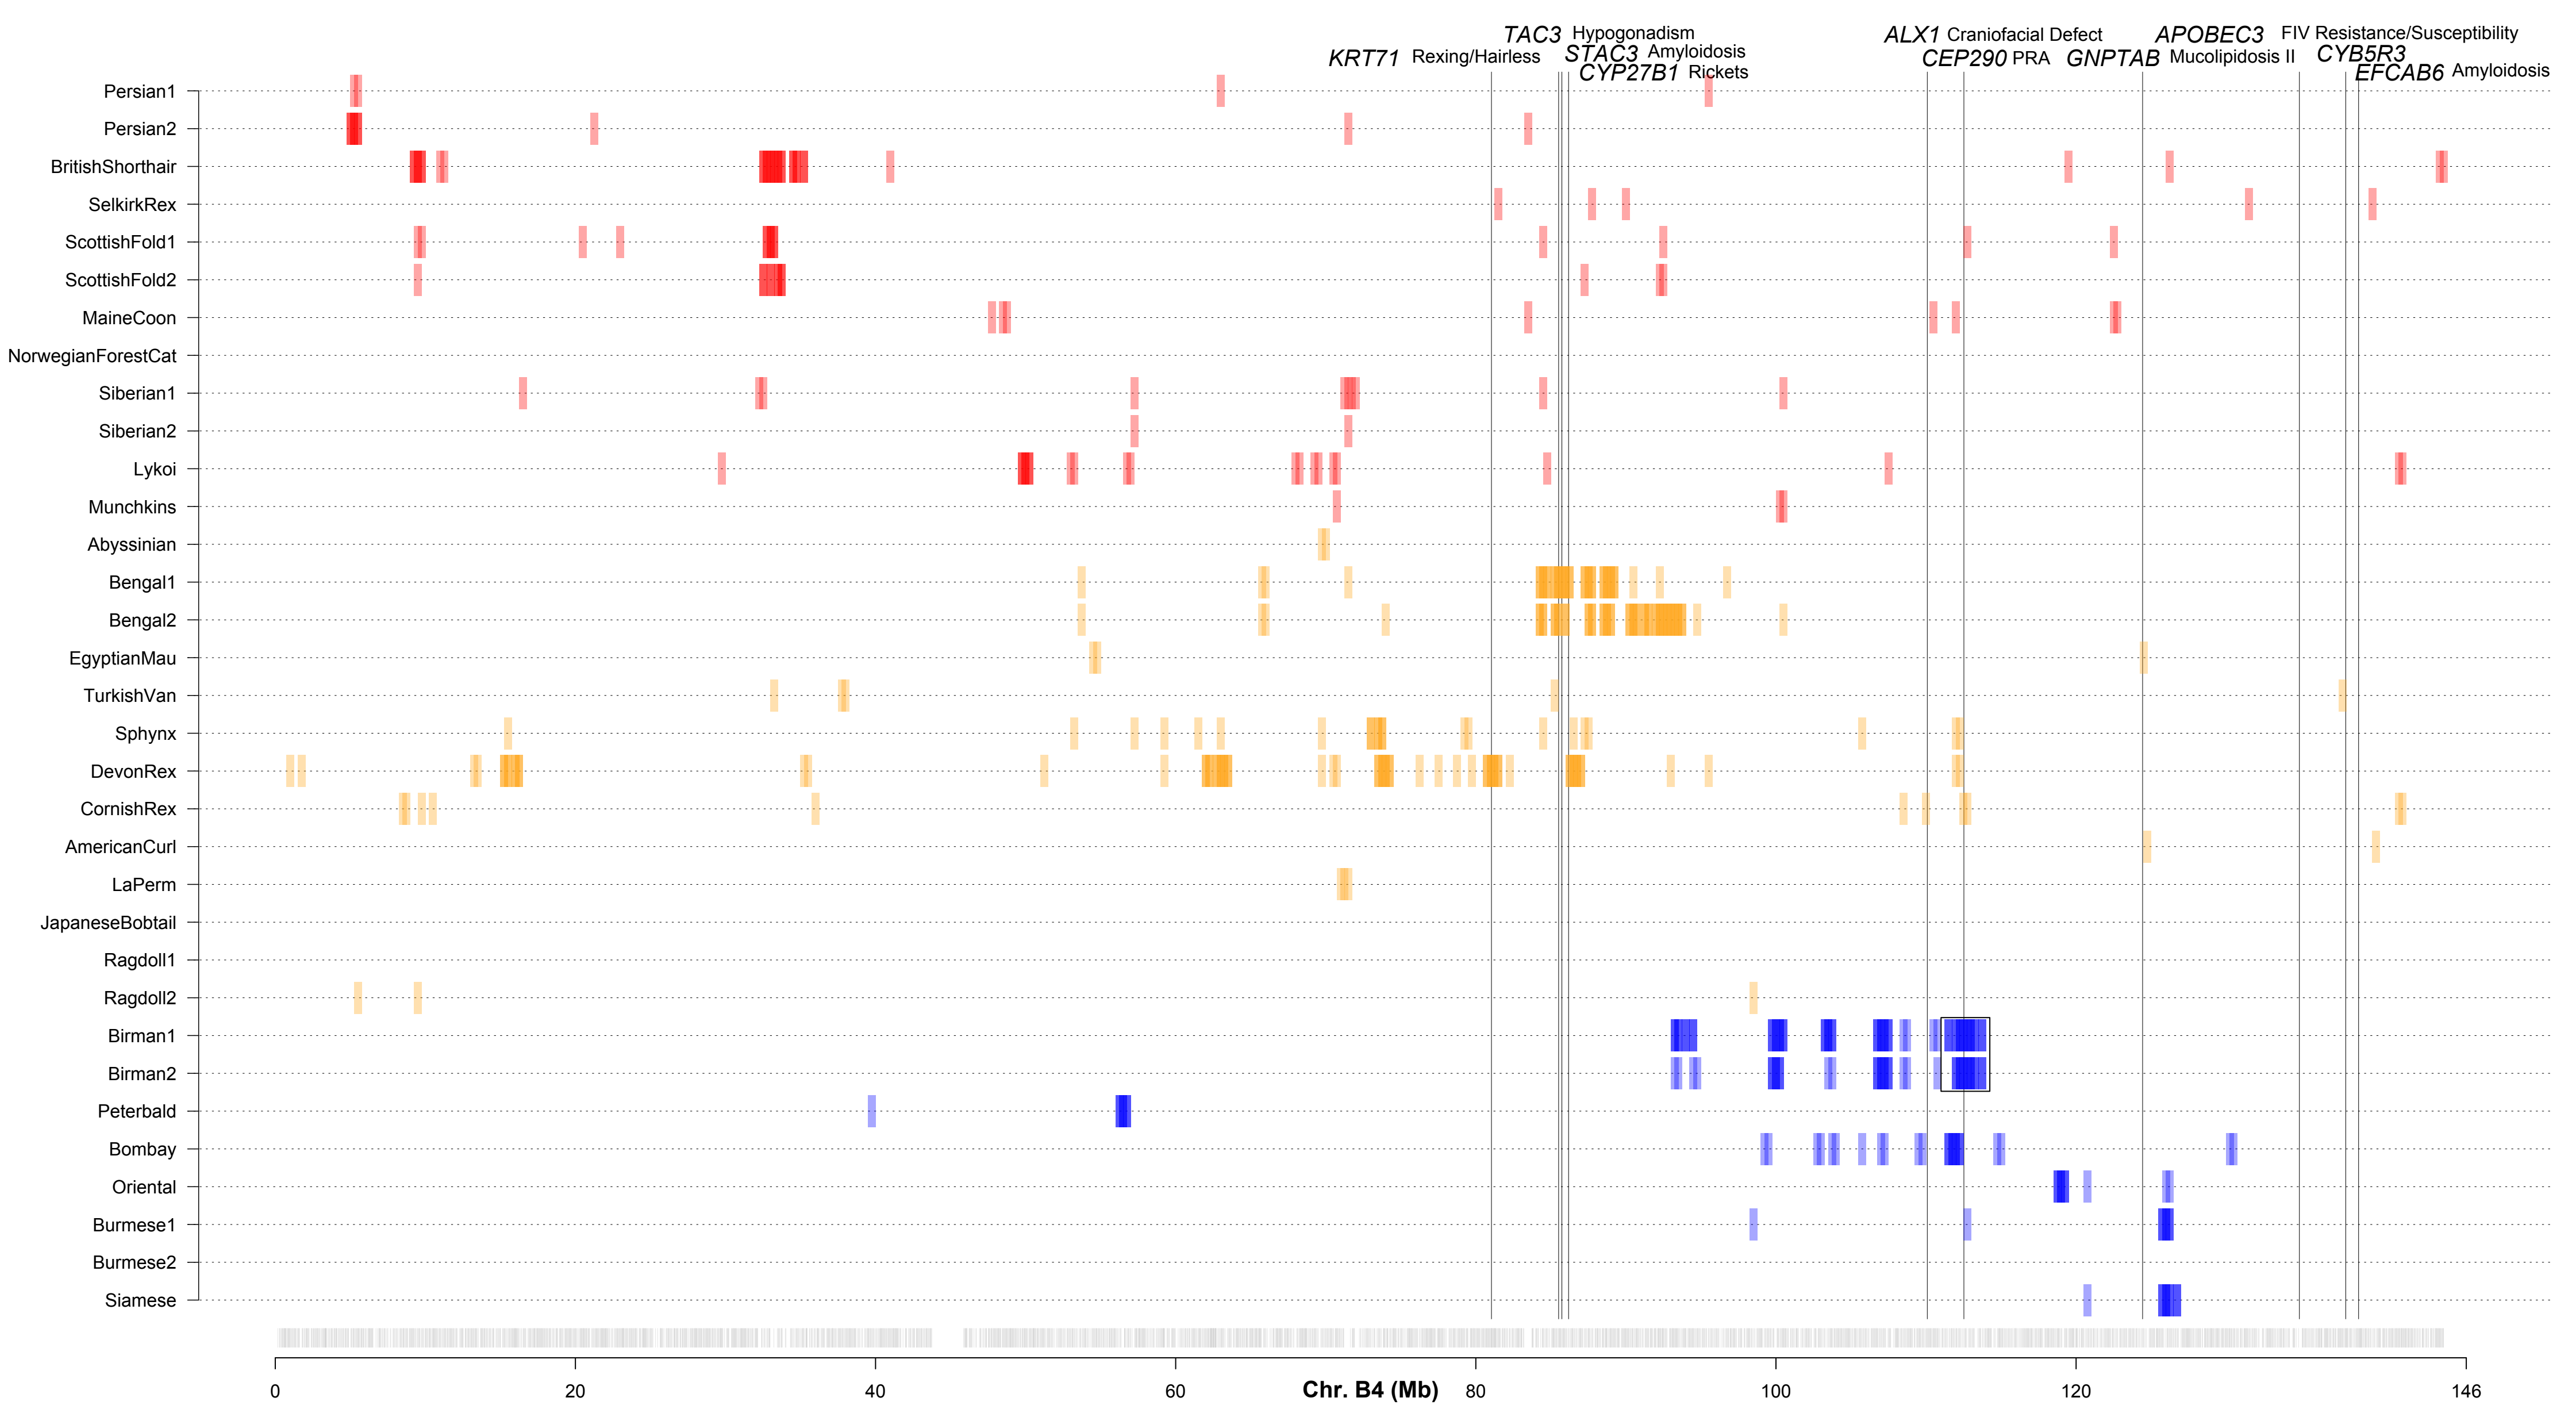

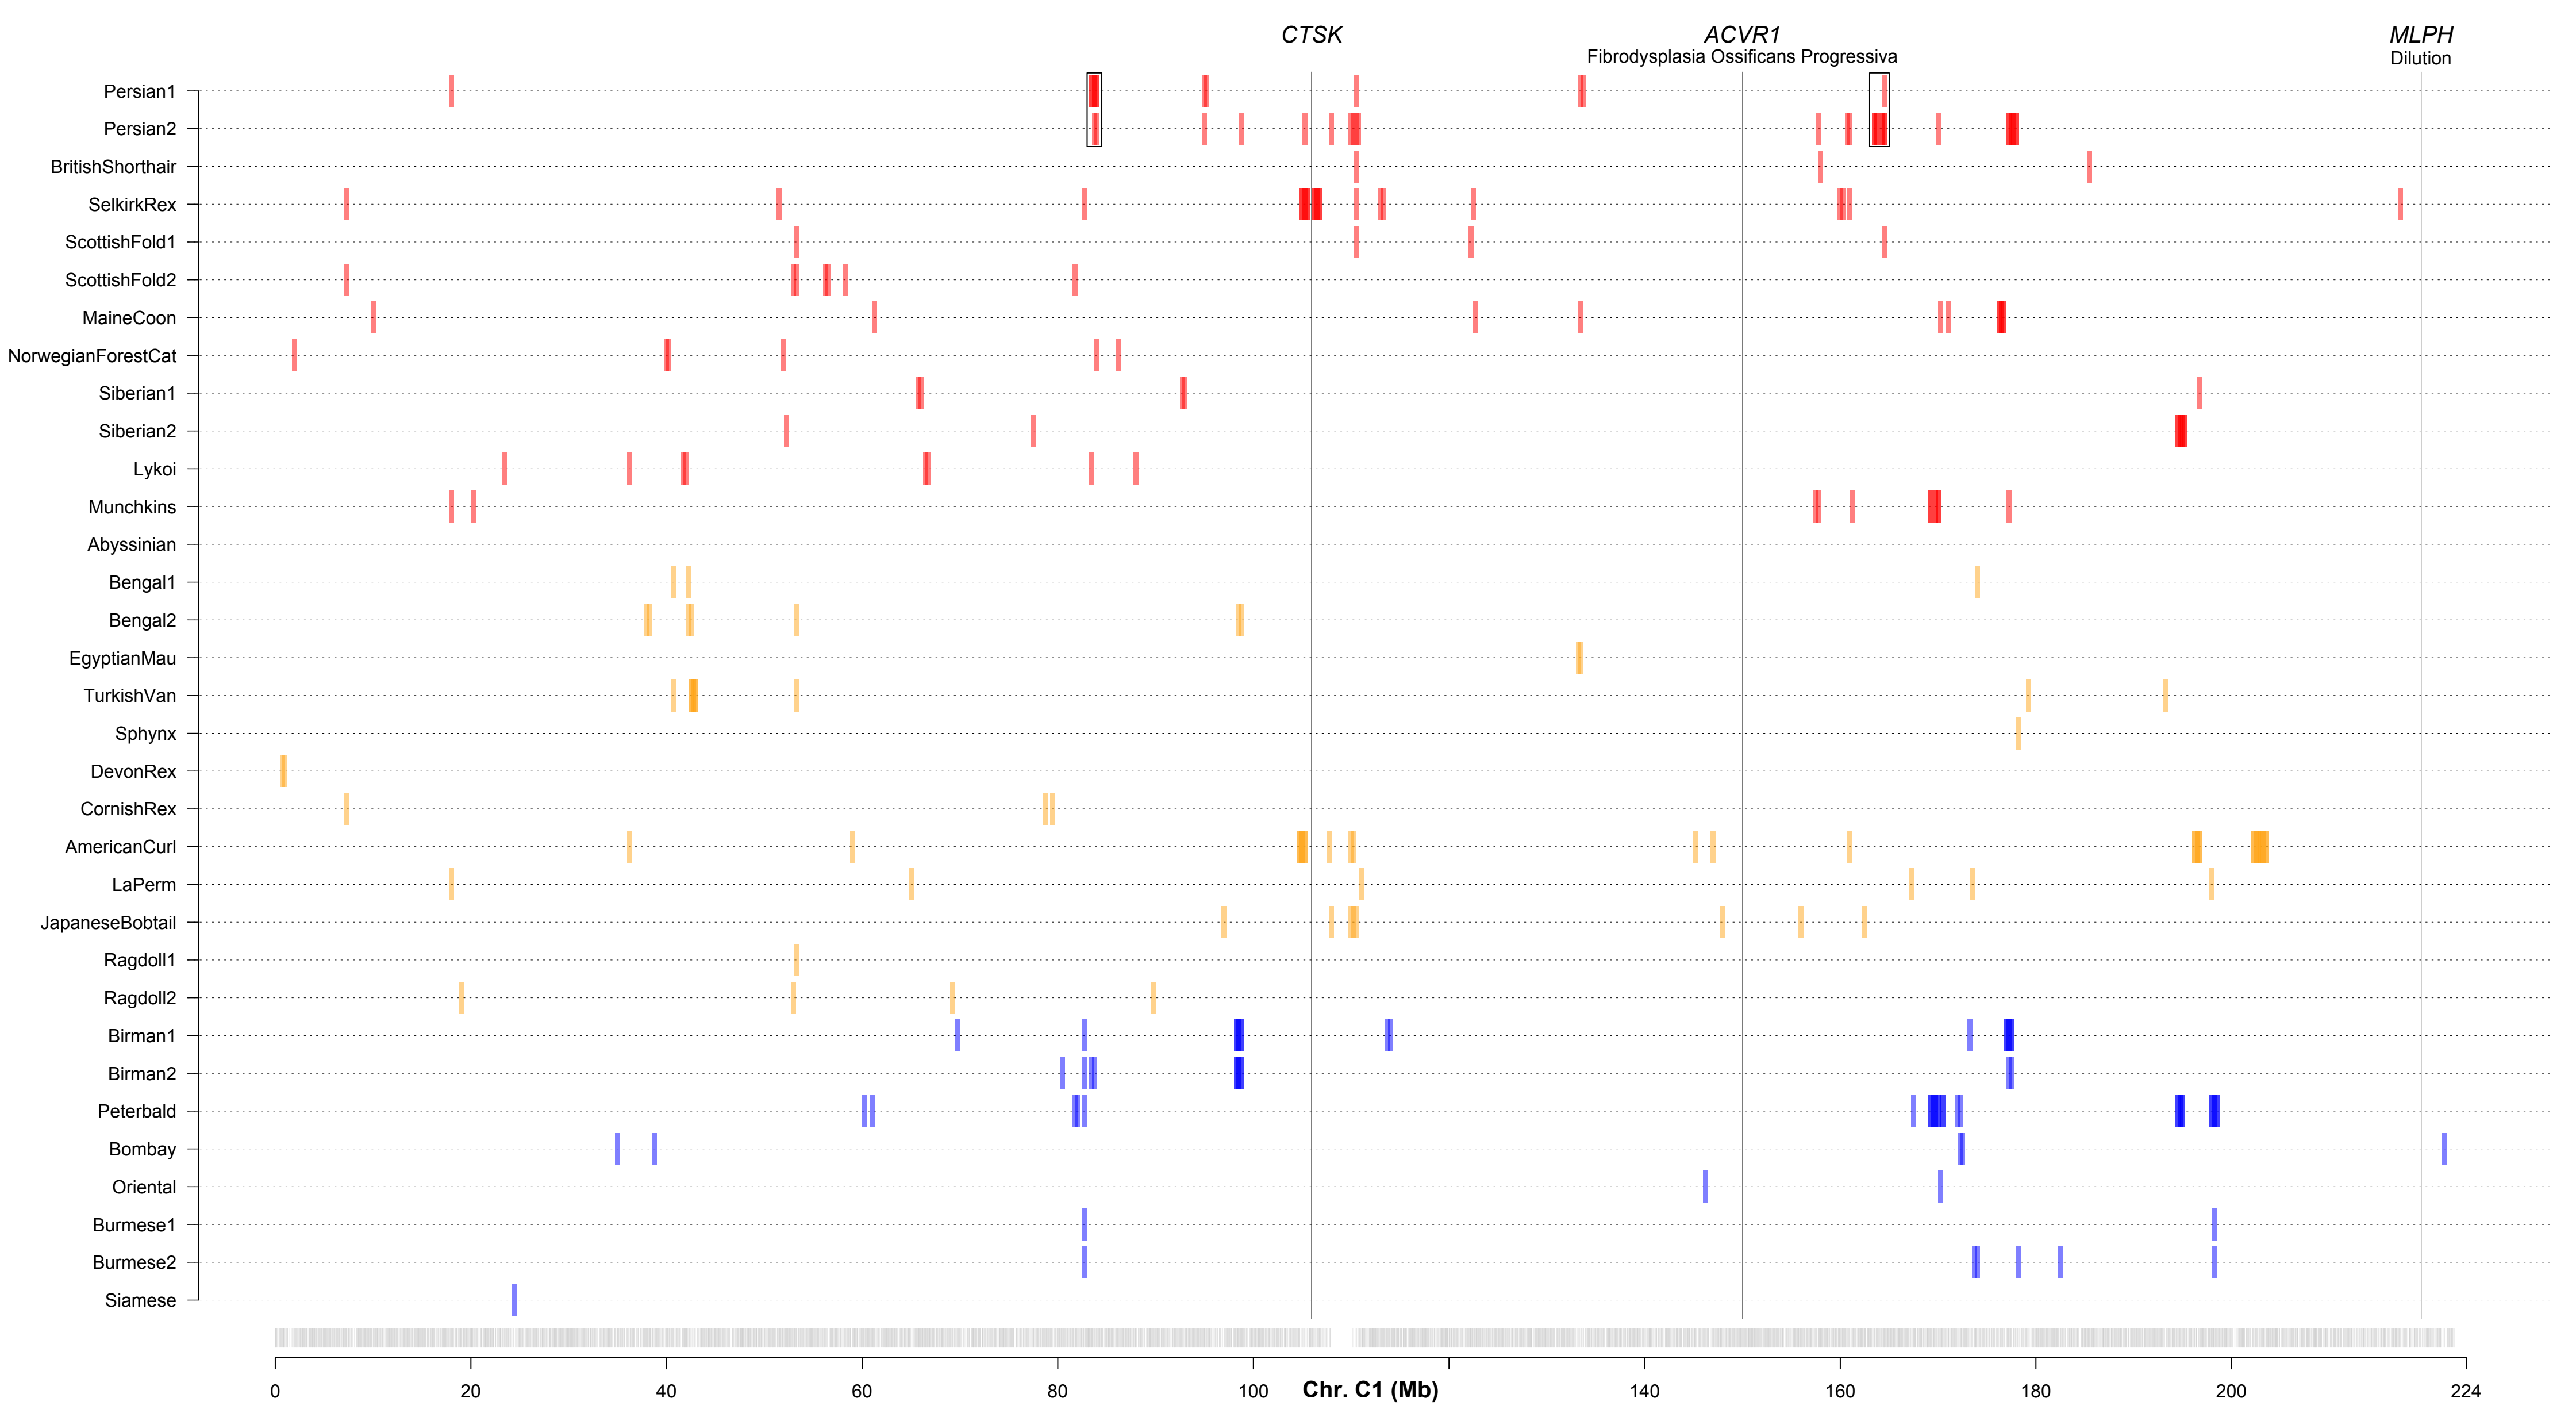



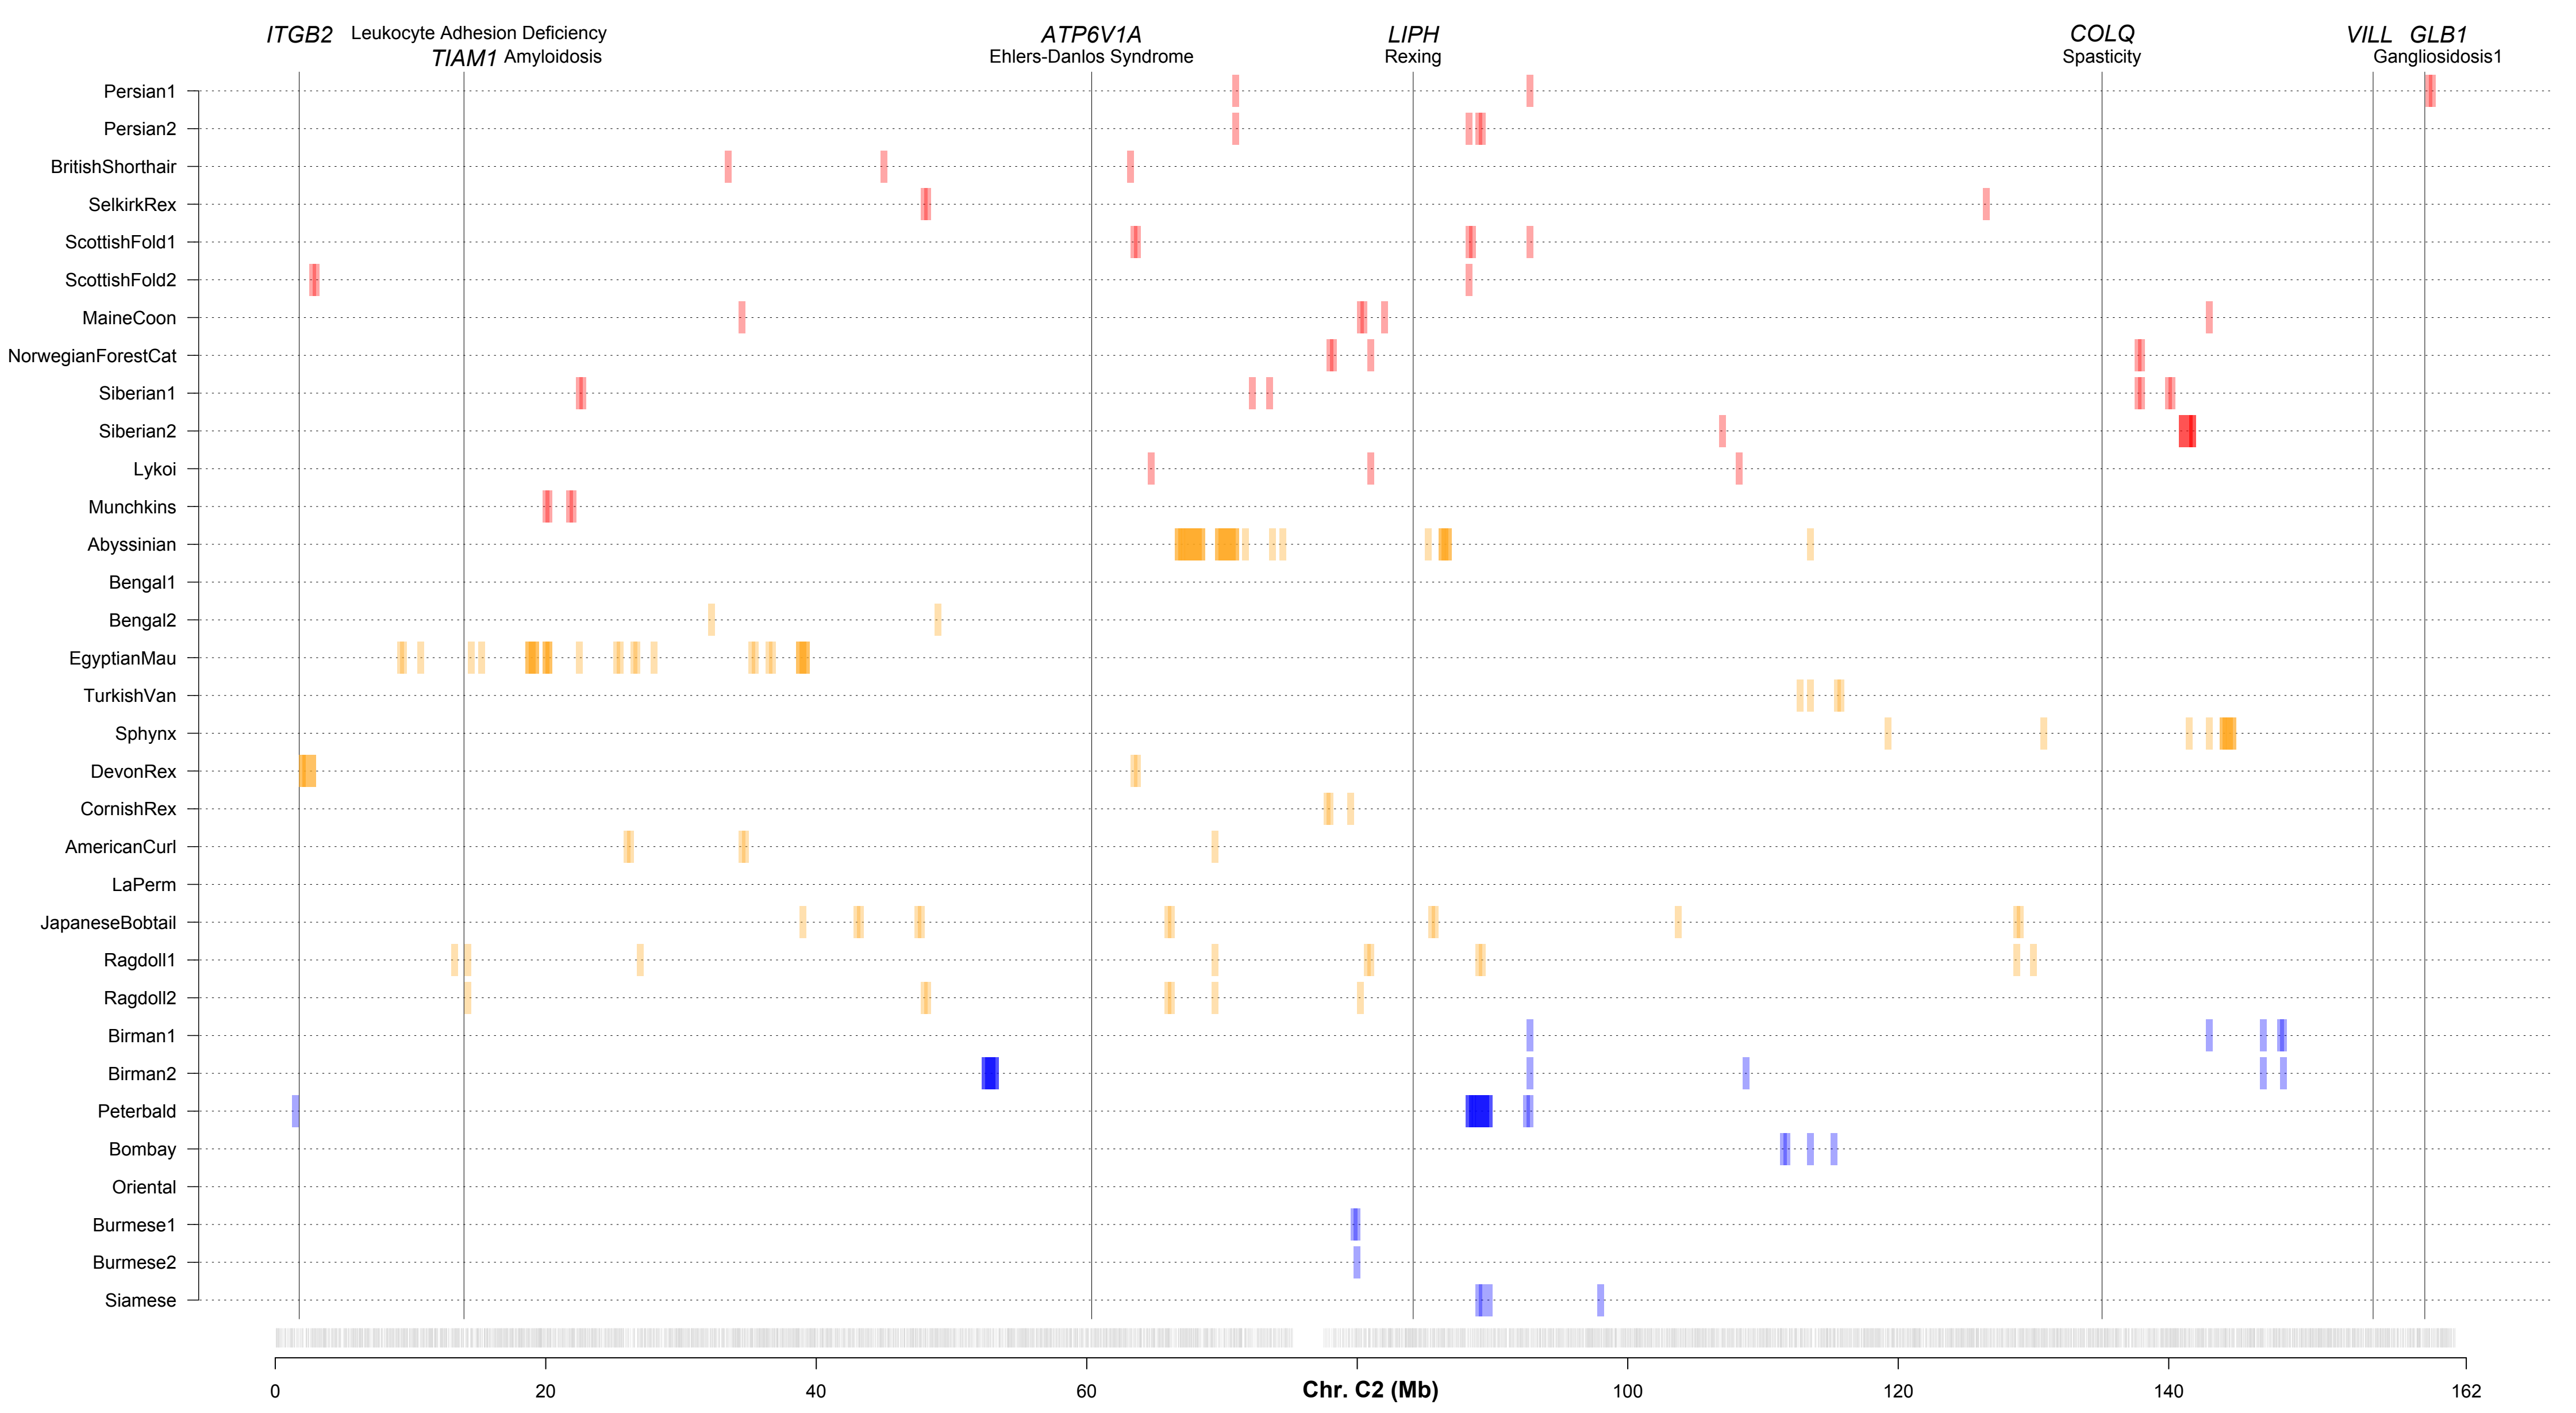

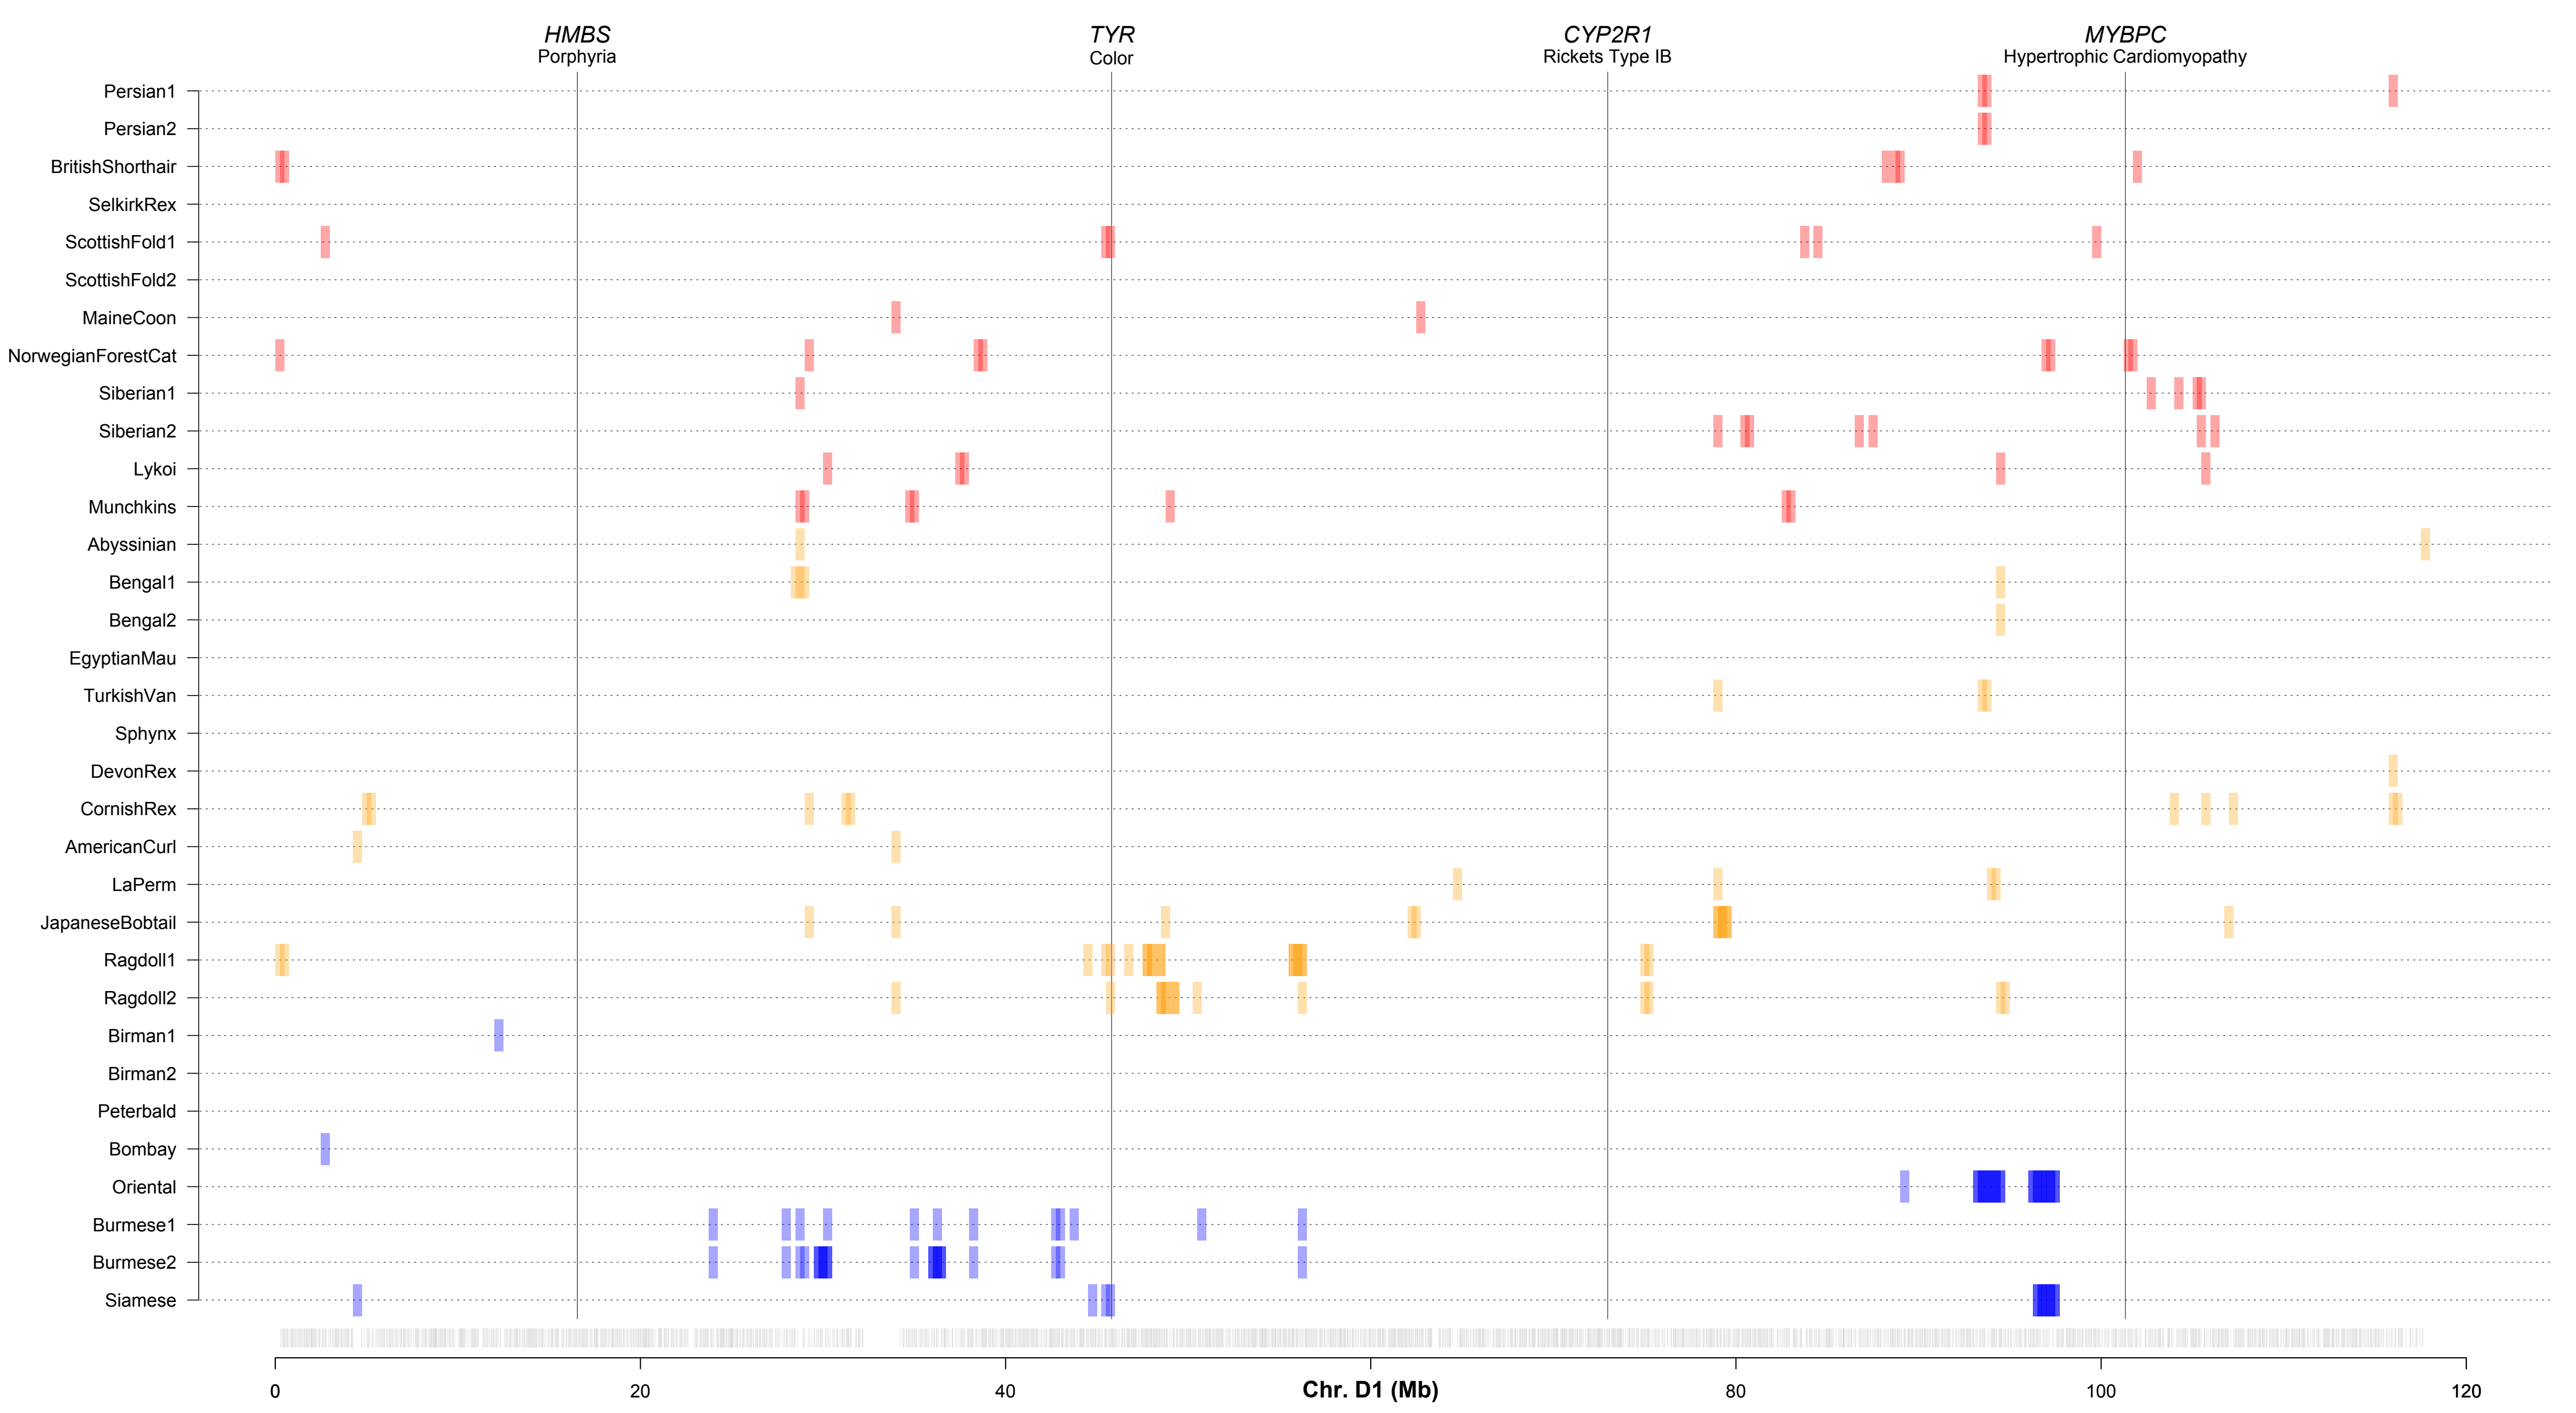

**UROS**  
Porphyria (congenital erythropoietic)

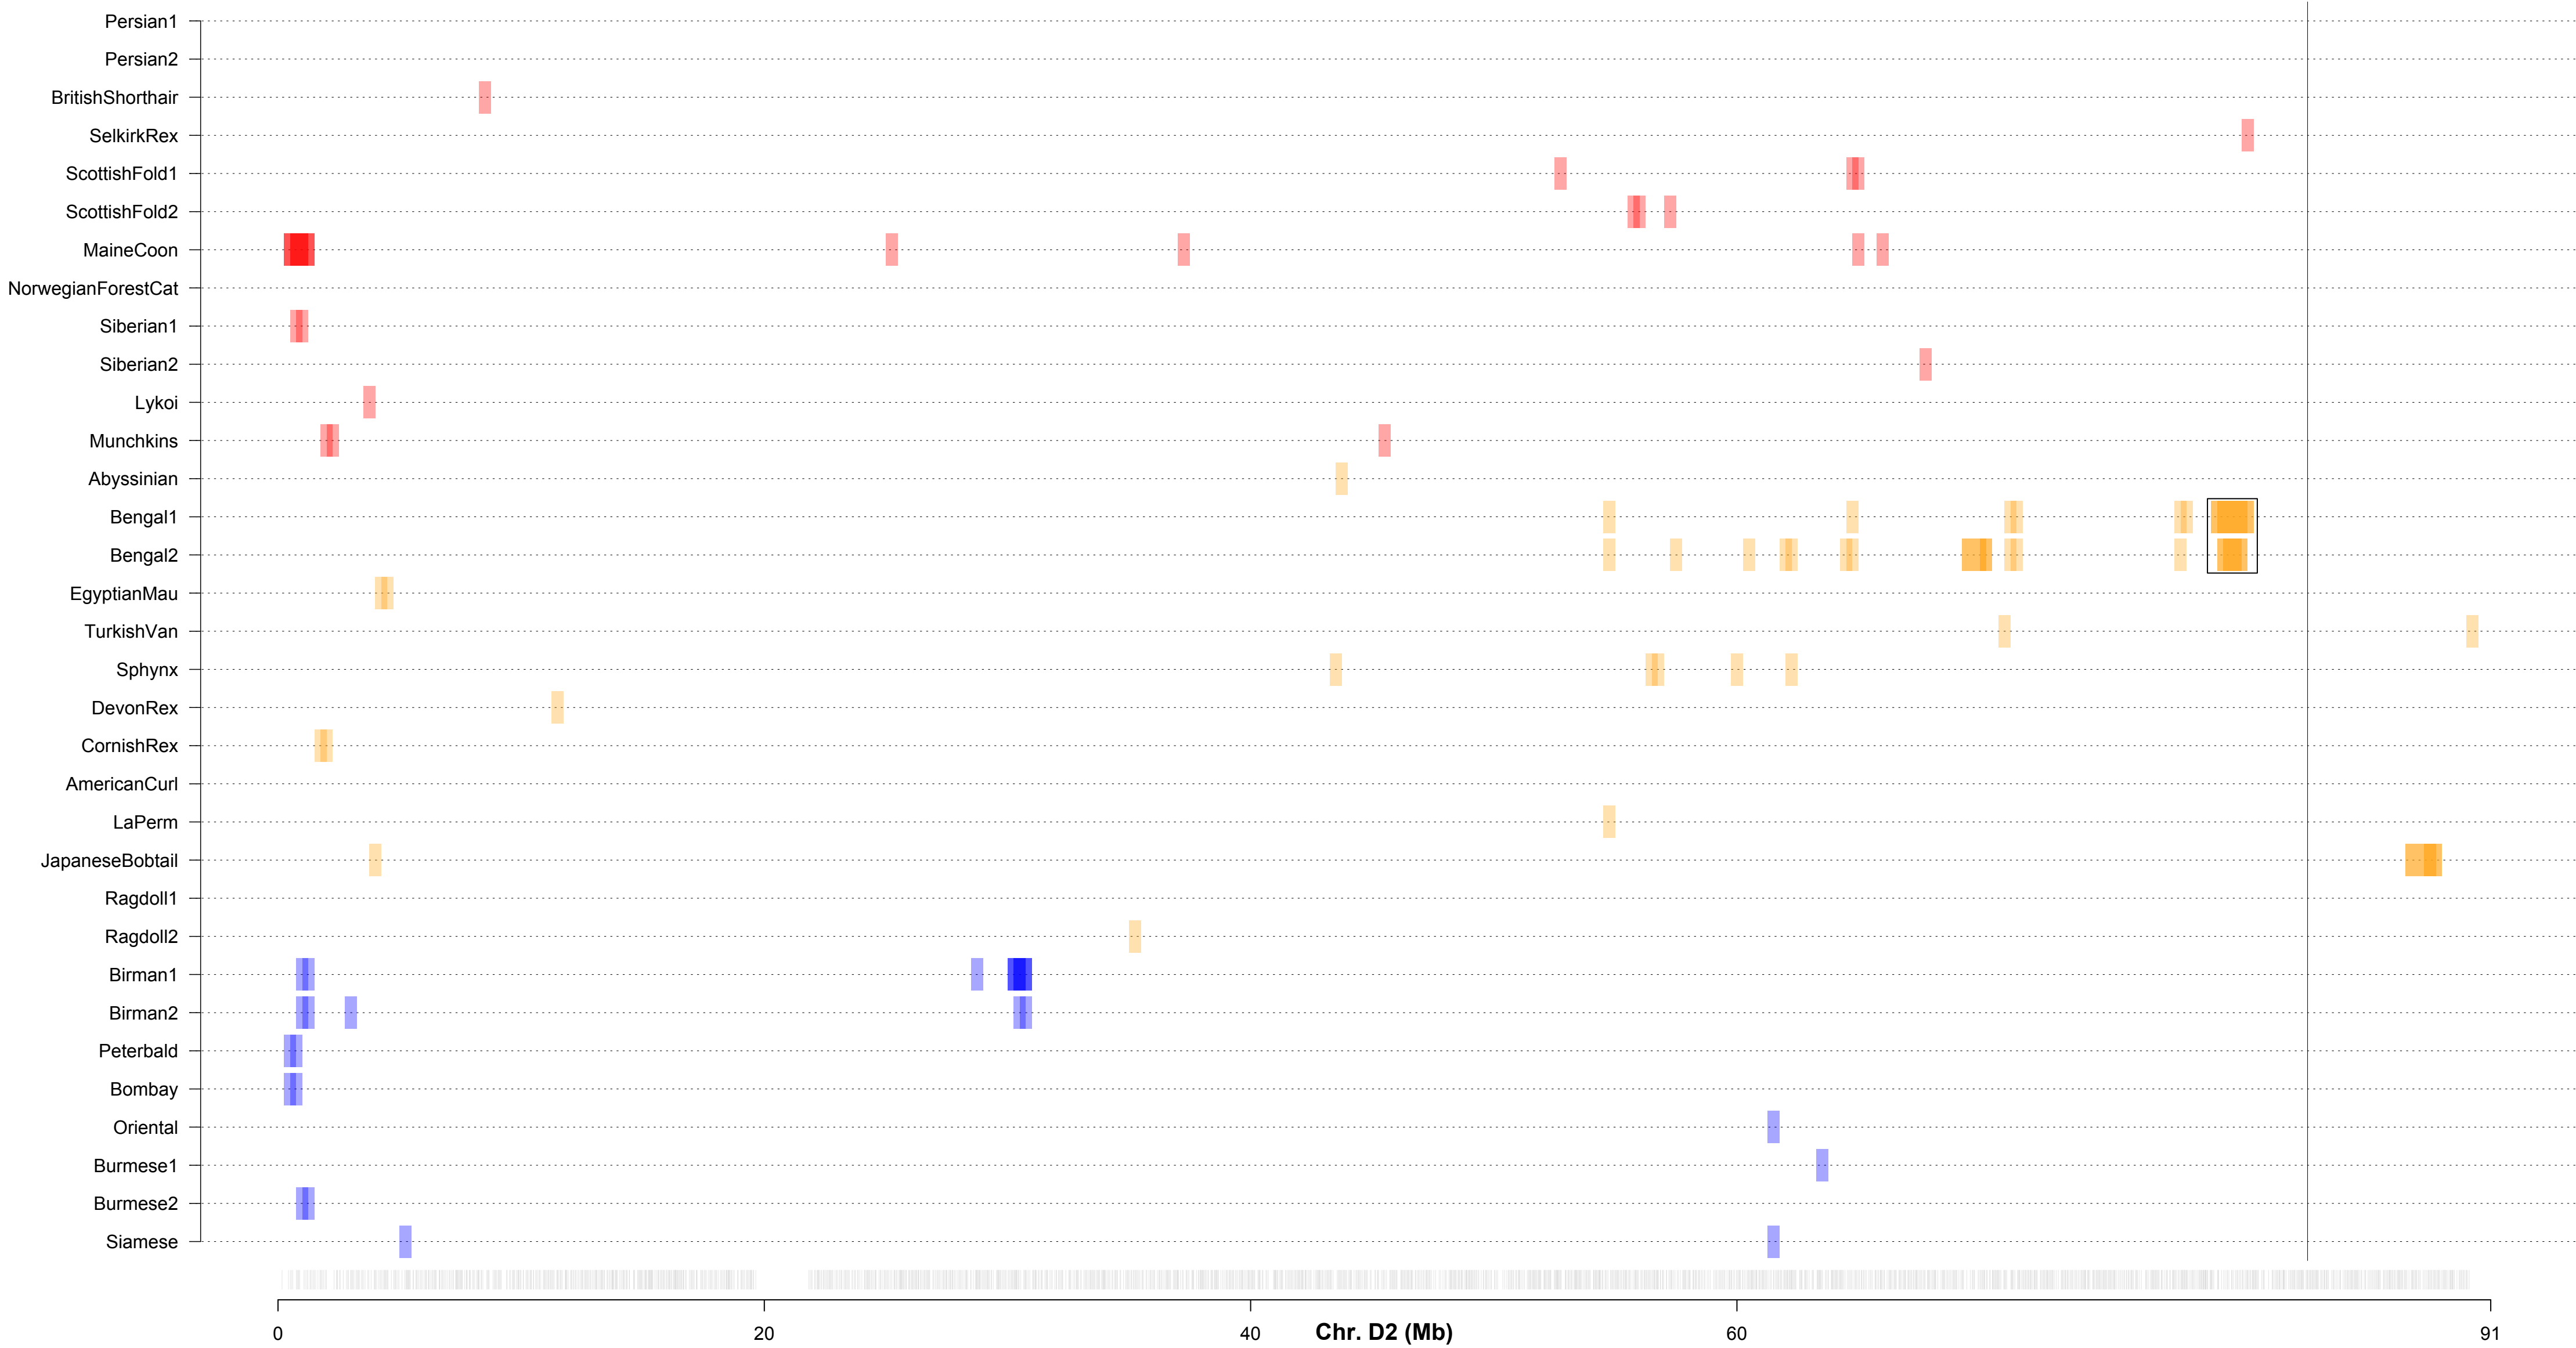

TRPV4

Fold

NPC1

Niemann-Pick C1

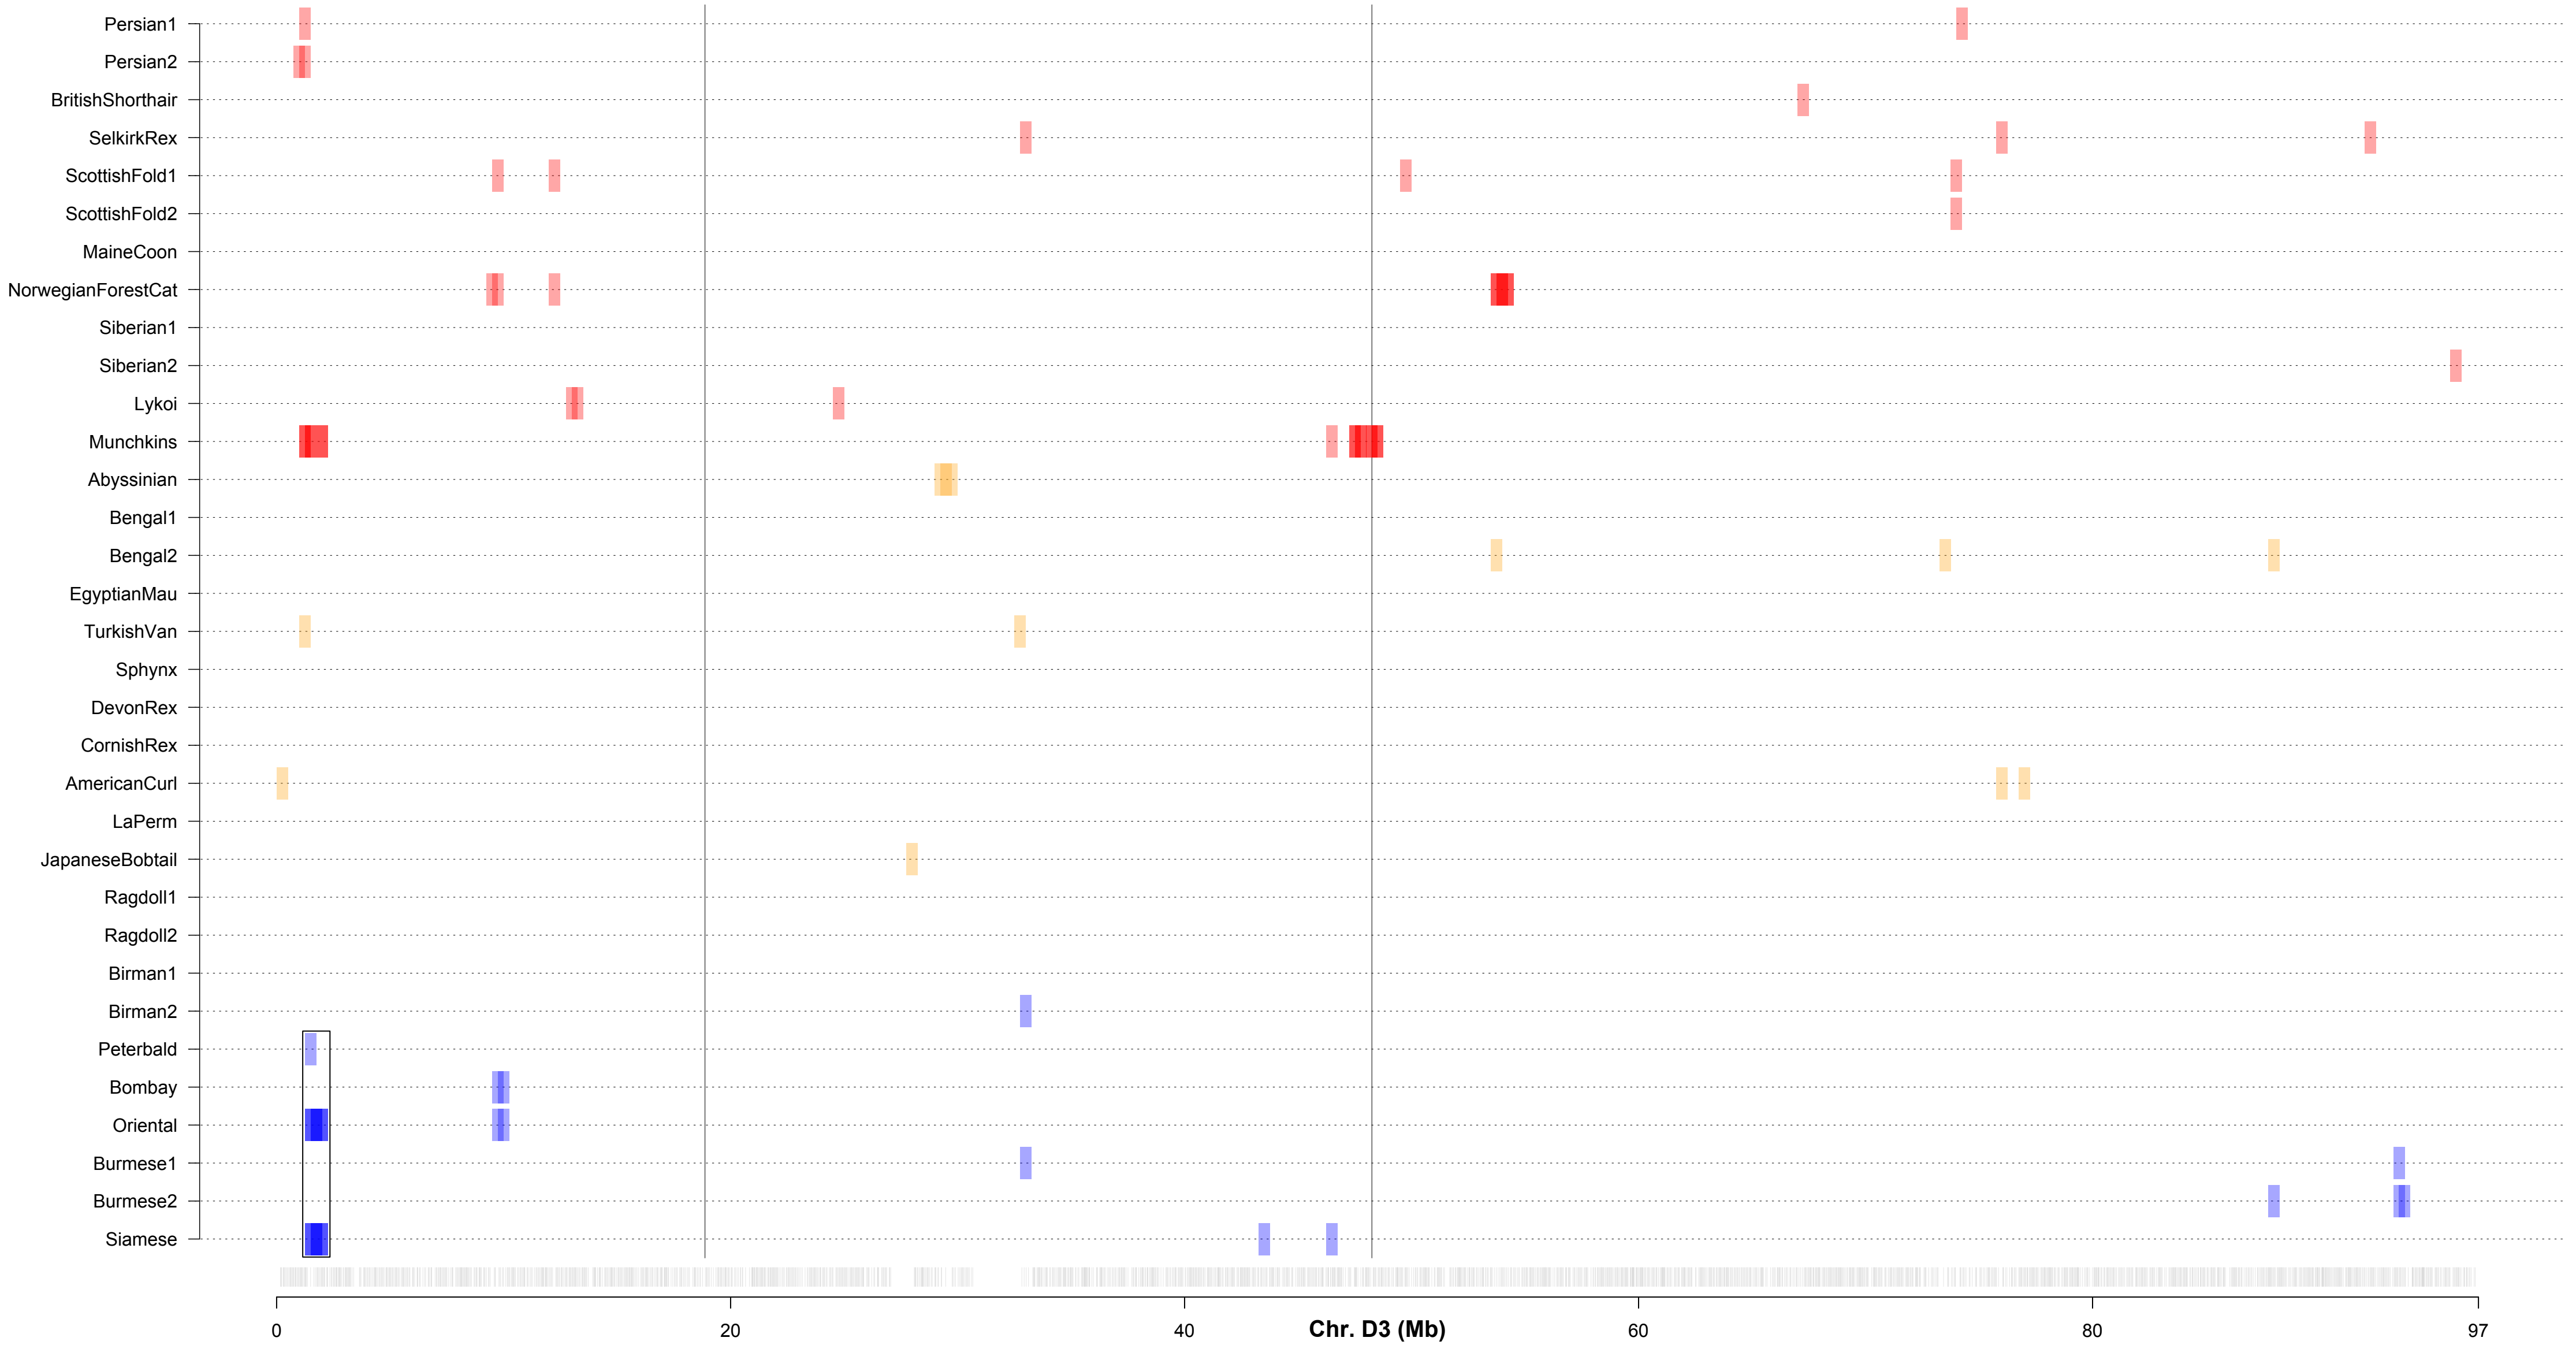

*GLIS3*

*TYRP1*

*GRHPR*

*FKBP15*

*COL5A1*

Brown

Hyperoxaluria

Ehlers-Danlos Syndrome

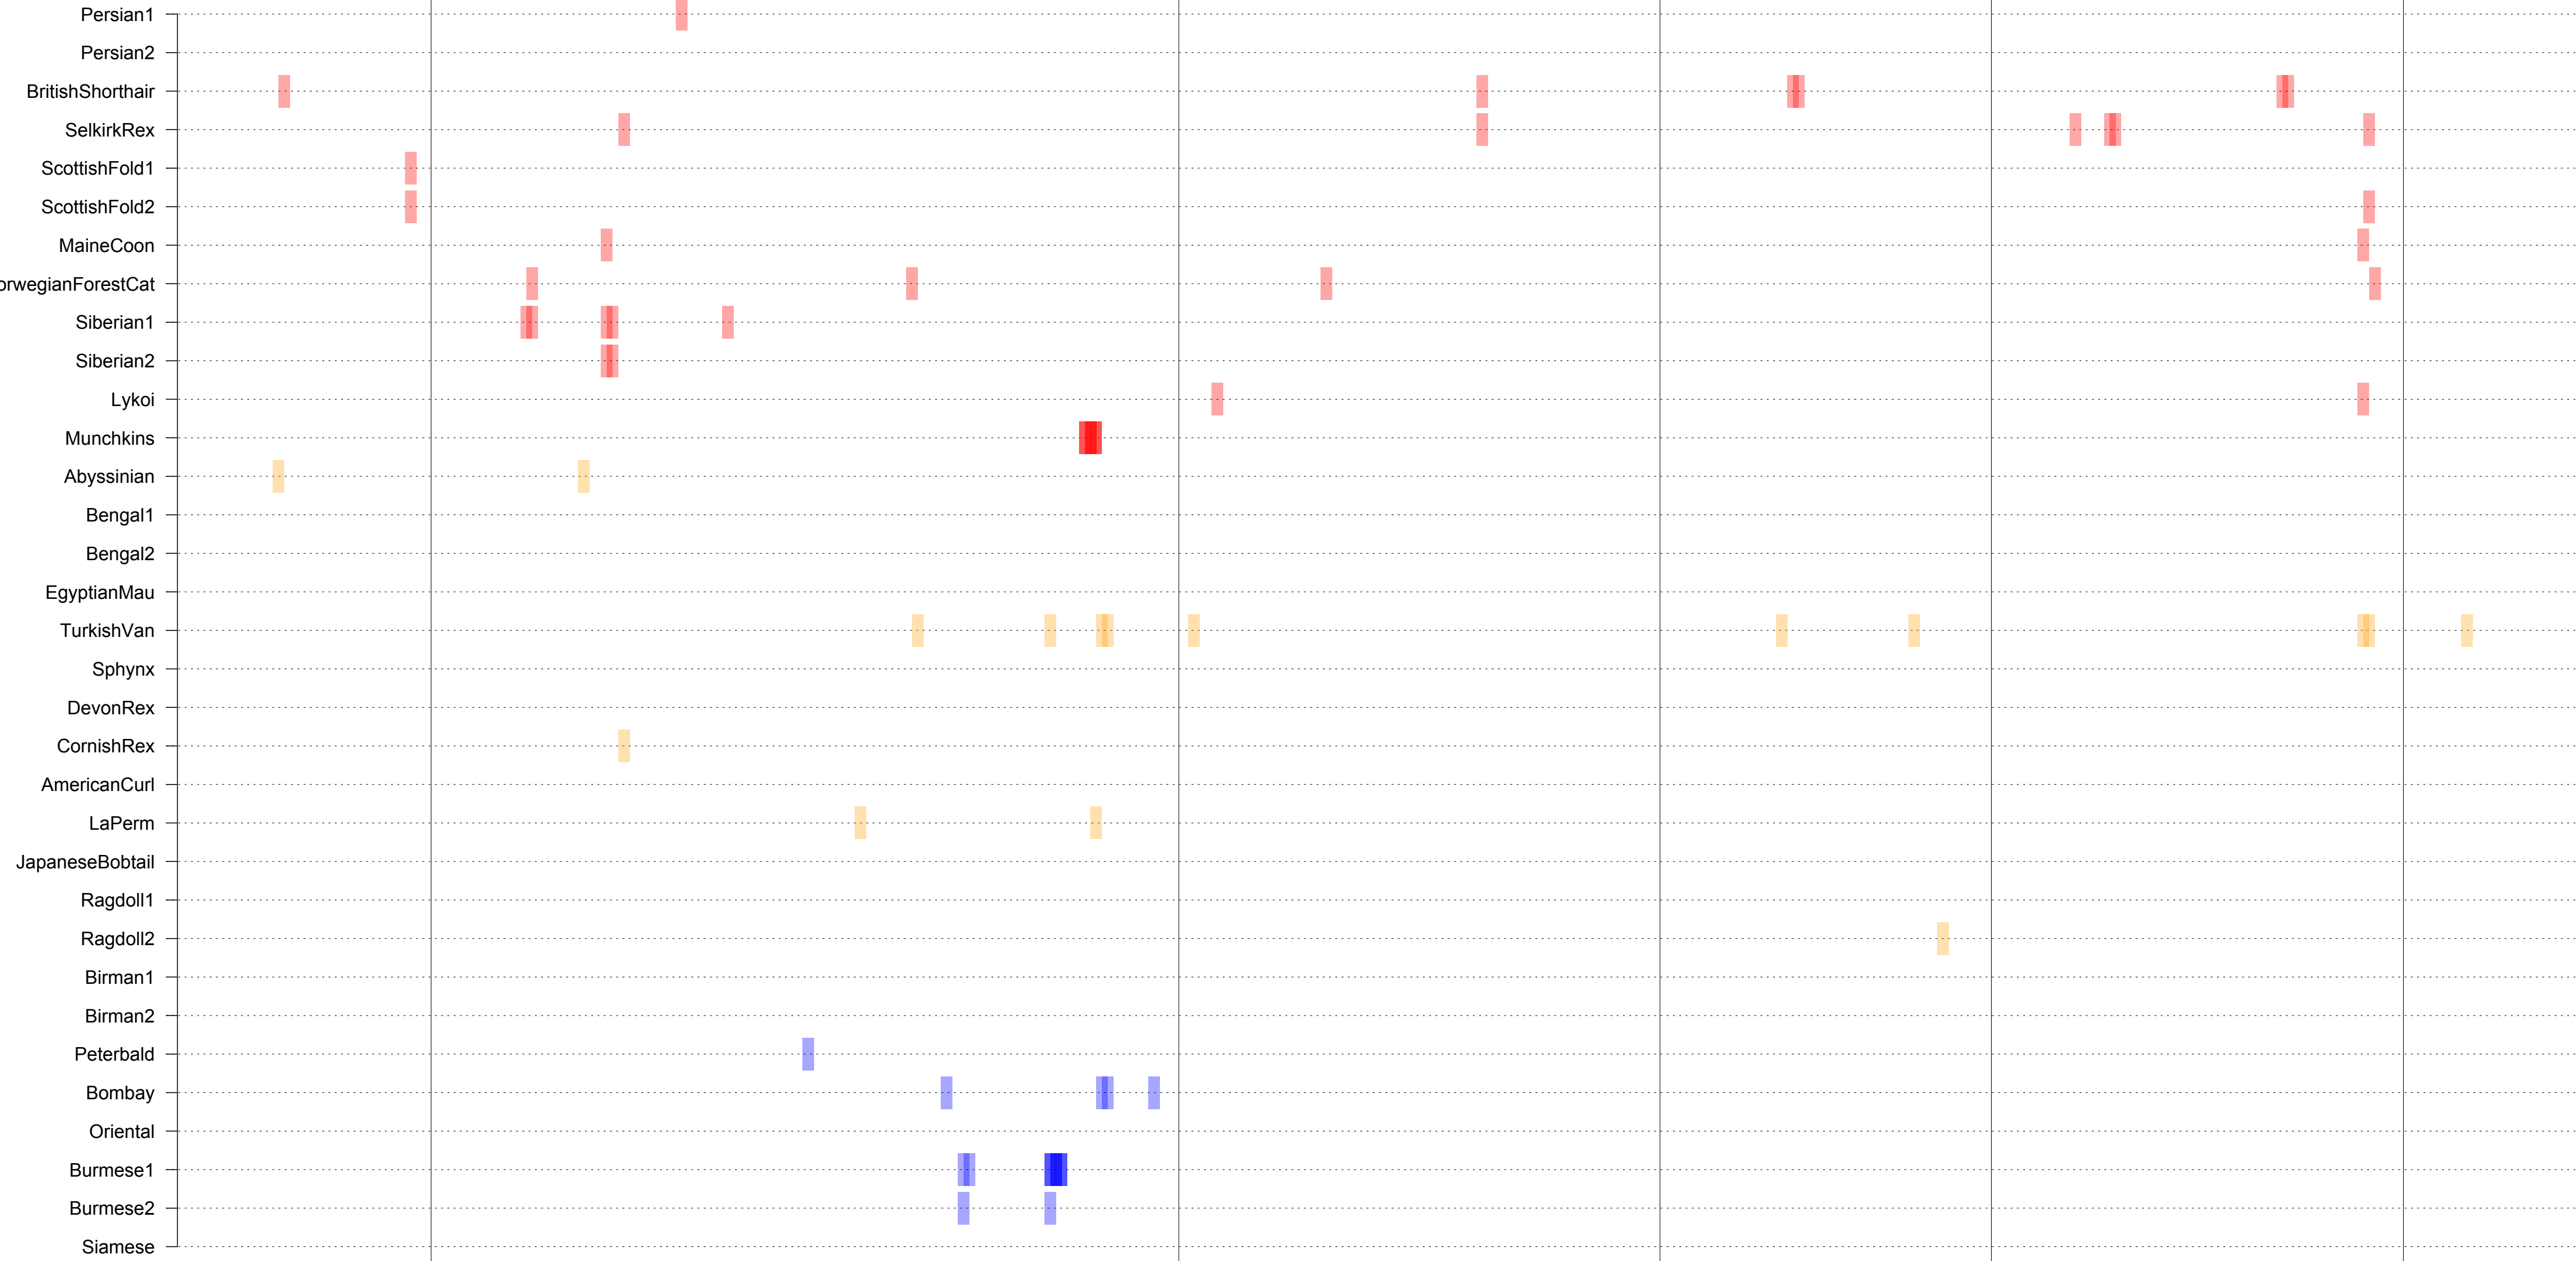

0 20 40 60 80 97 Chr. D4 (Mb)

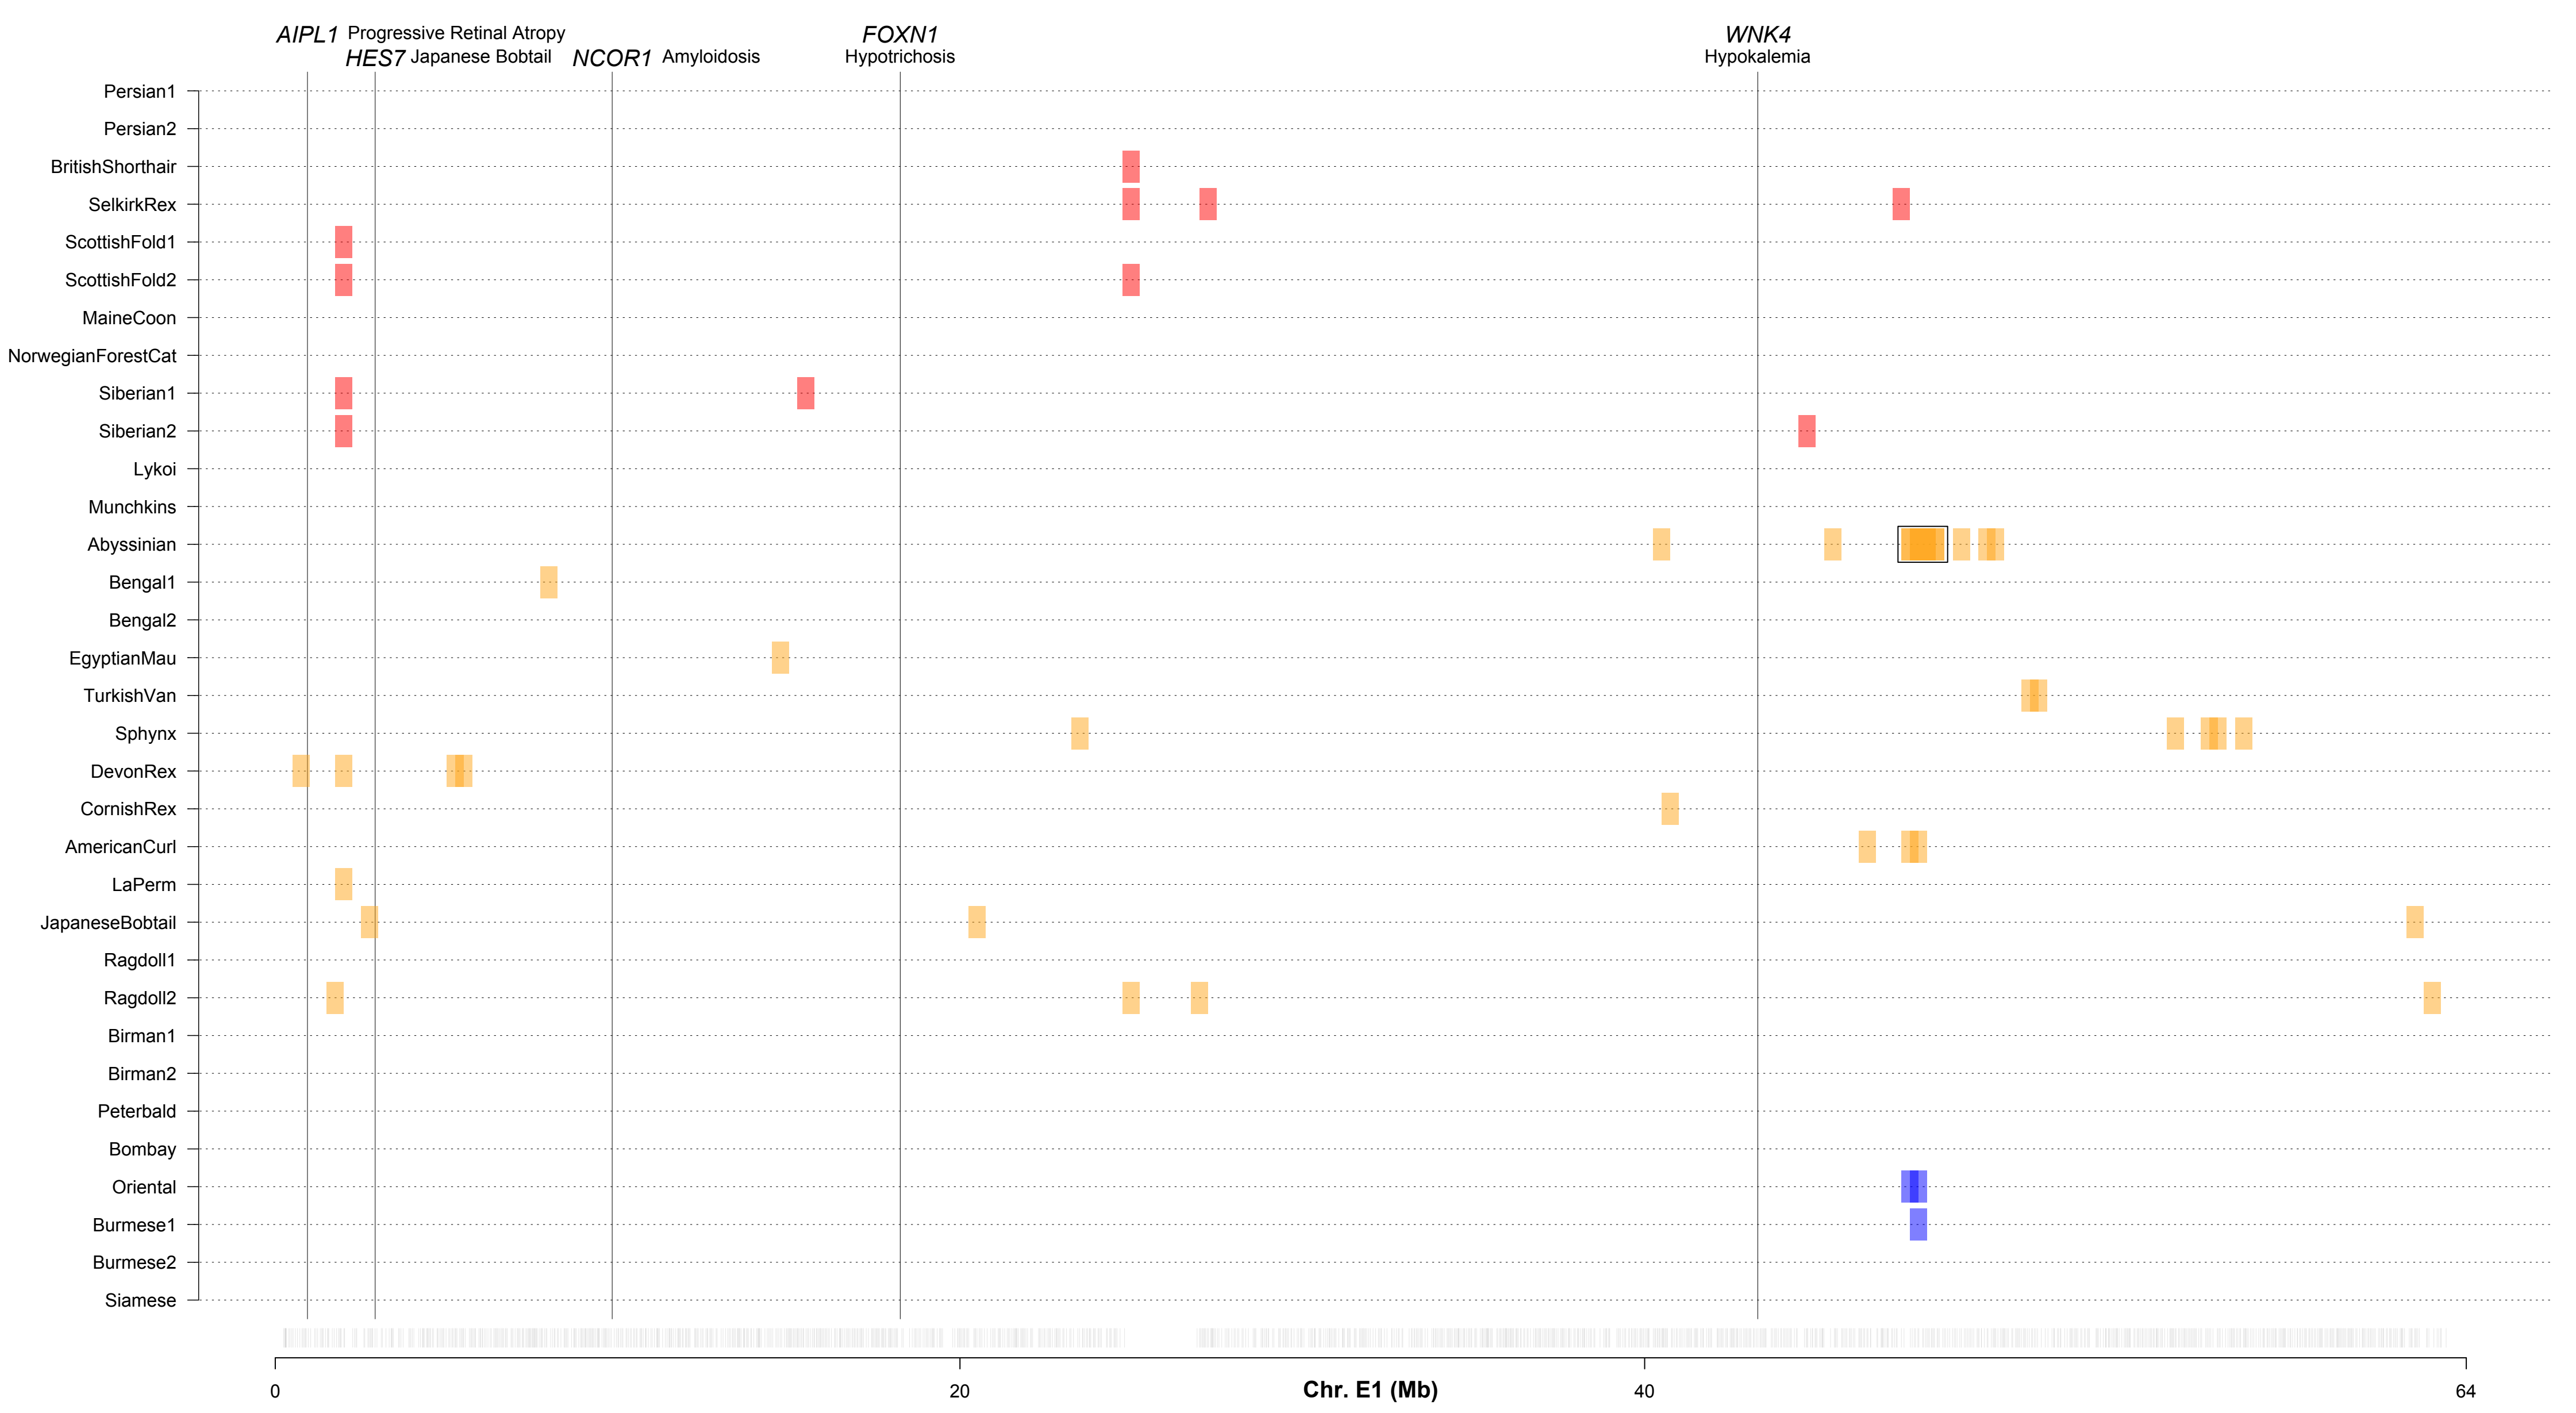

*CRX*  
Progressive Retinal Atropy

*SLC7A9*  
Cystinuria TypeB

*MC1R*  
Extension

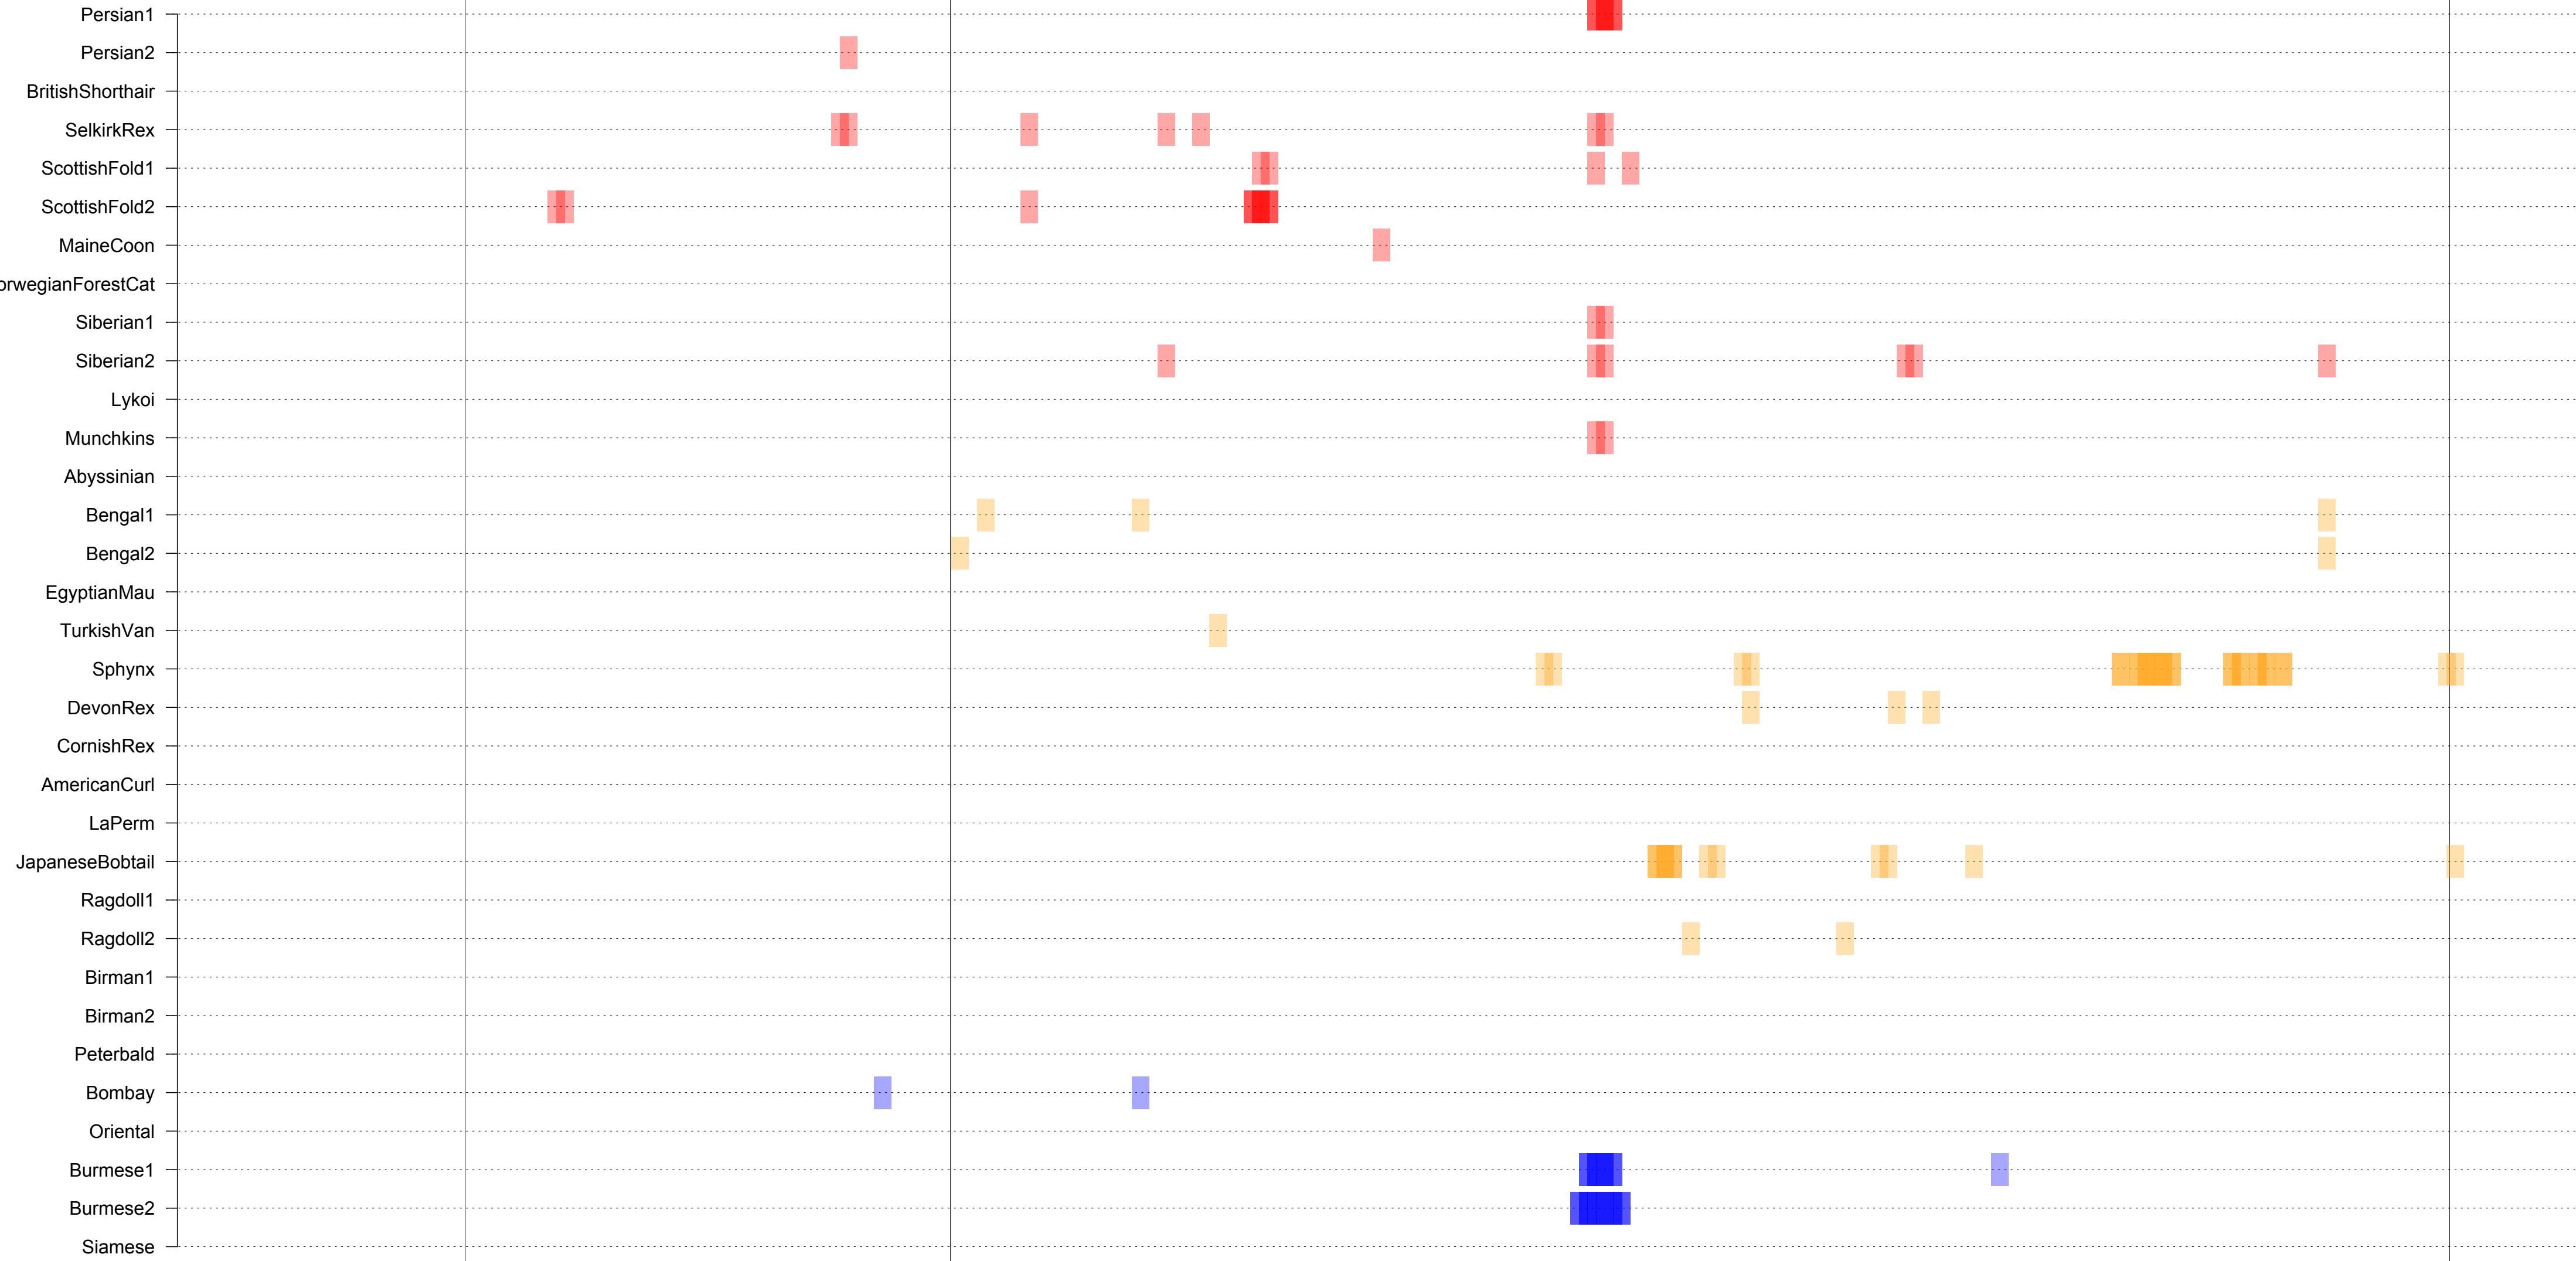

0 20 40 65  
Chr. E2 (Mb)

*GUSB*  
Mucopolysaccharidosis VII

*PKD1*  
Polycystic Kidney Disease

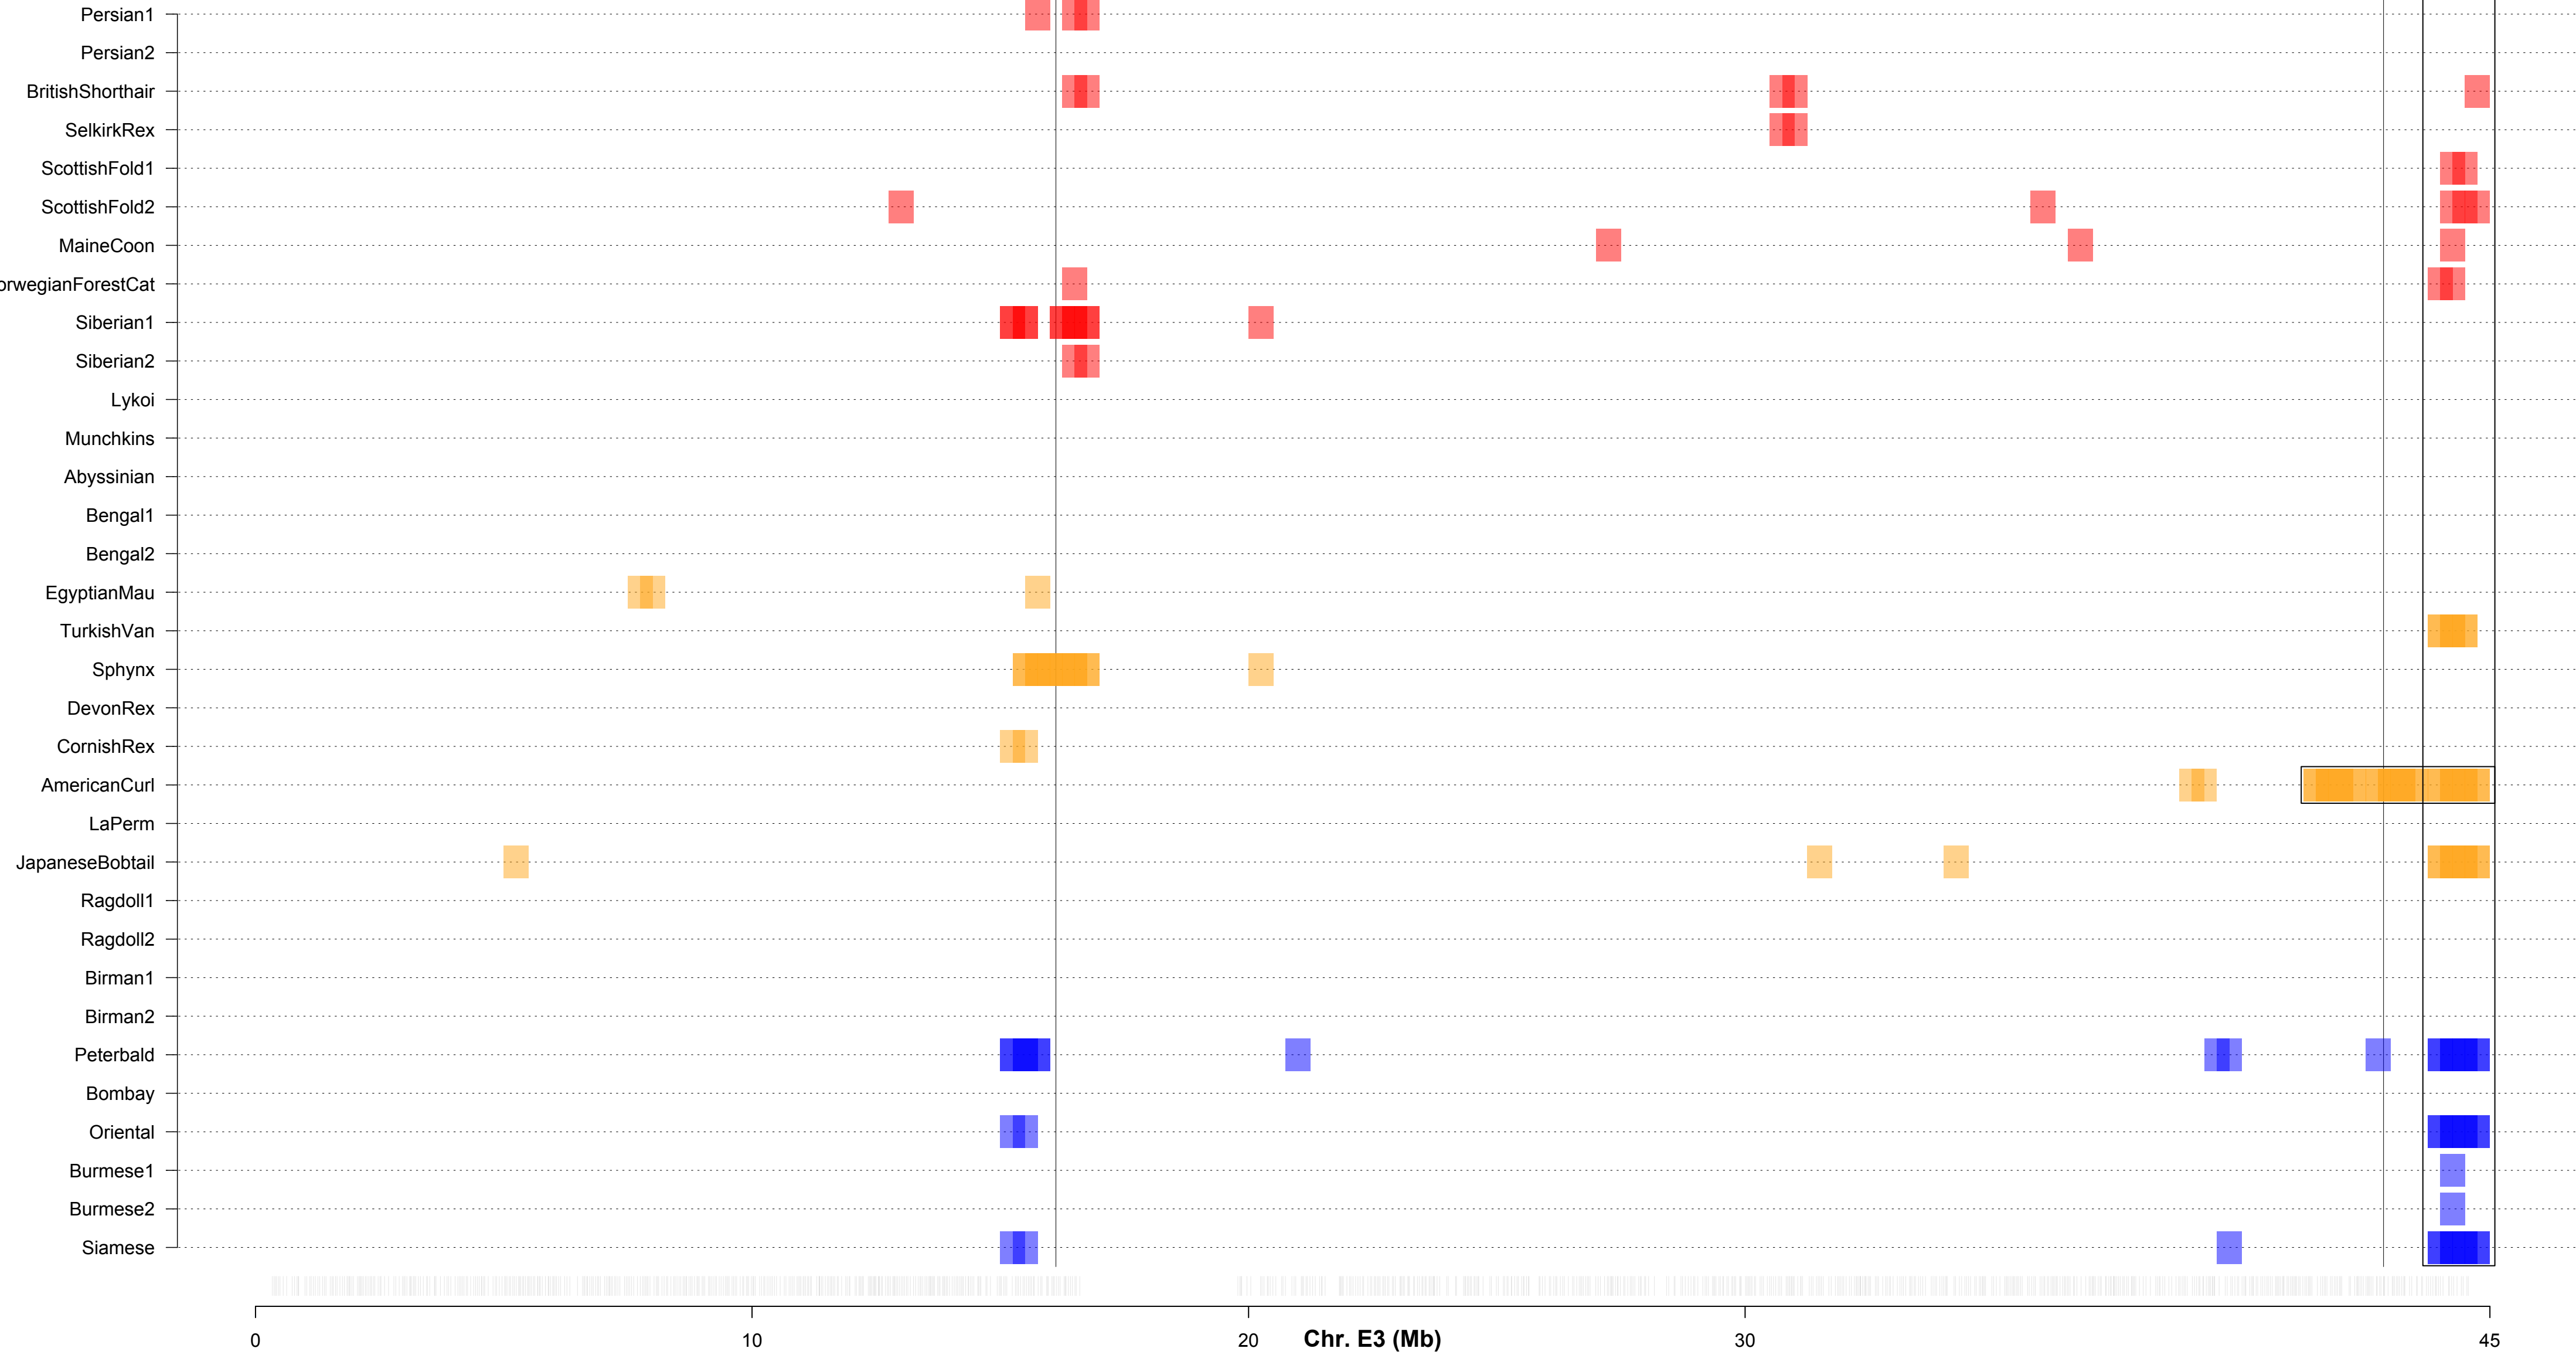



*KIF26B*

*FASL*

*SLC30A10*

*PEA15* Cerebral Dysgenesis  
*PKLR* Pyruvate Kinase Def.

Autoimmune lymphoproliferative Disease

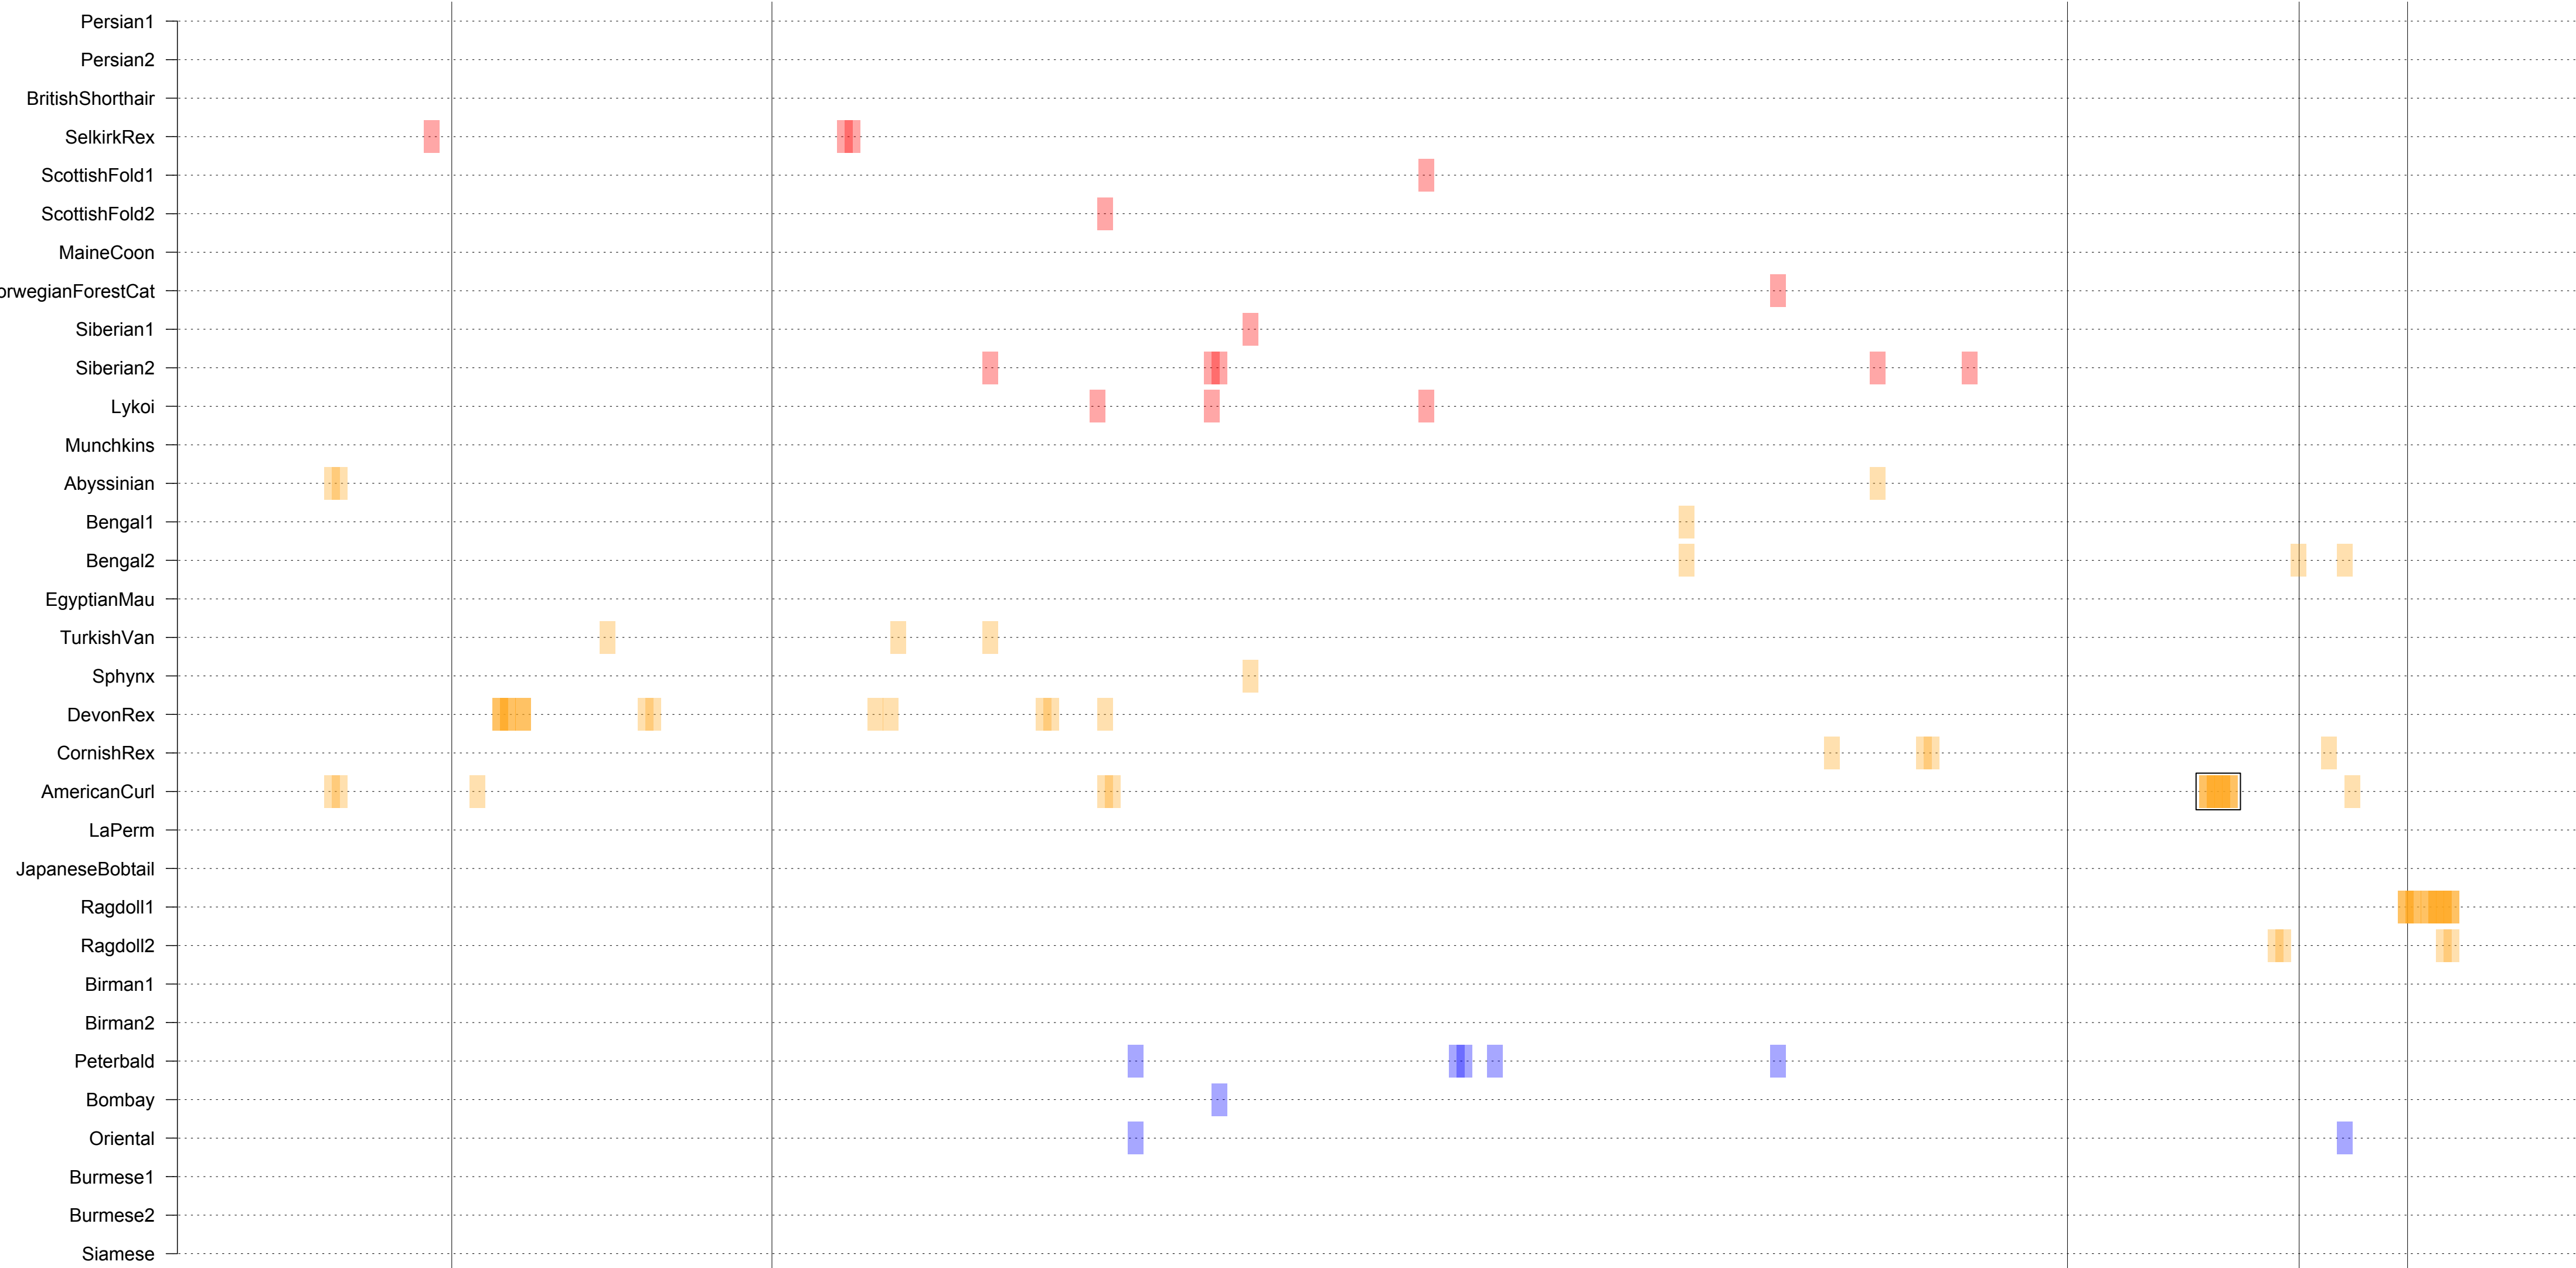

0 20 40 60 73  
Chr. F1 (Mb)

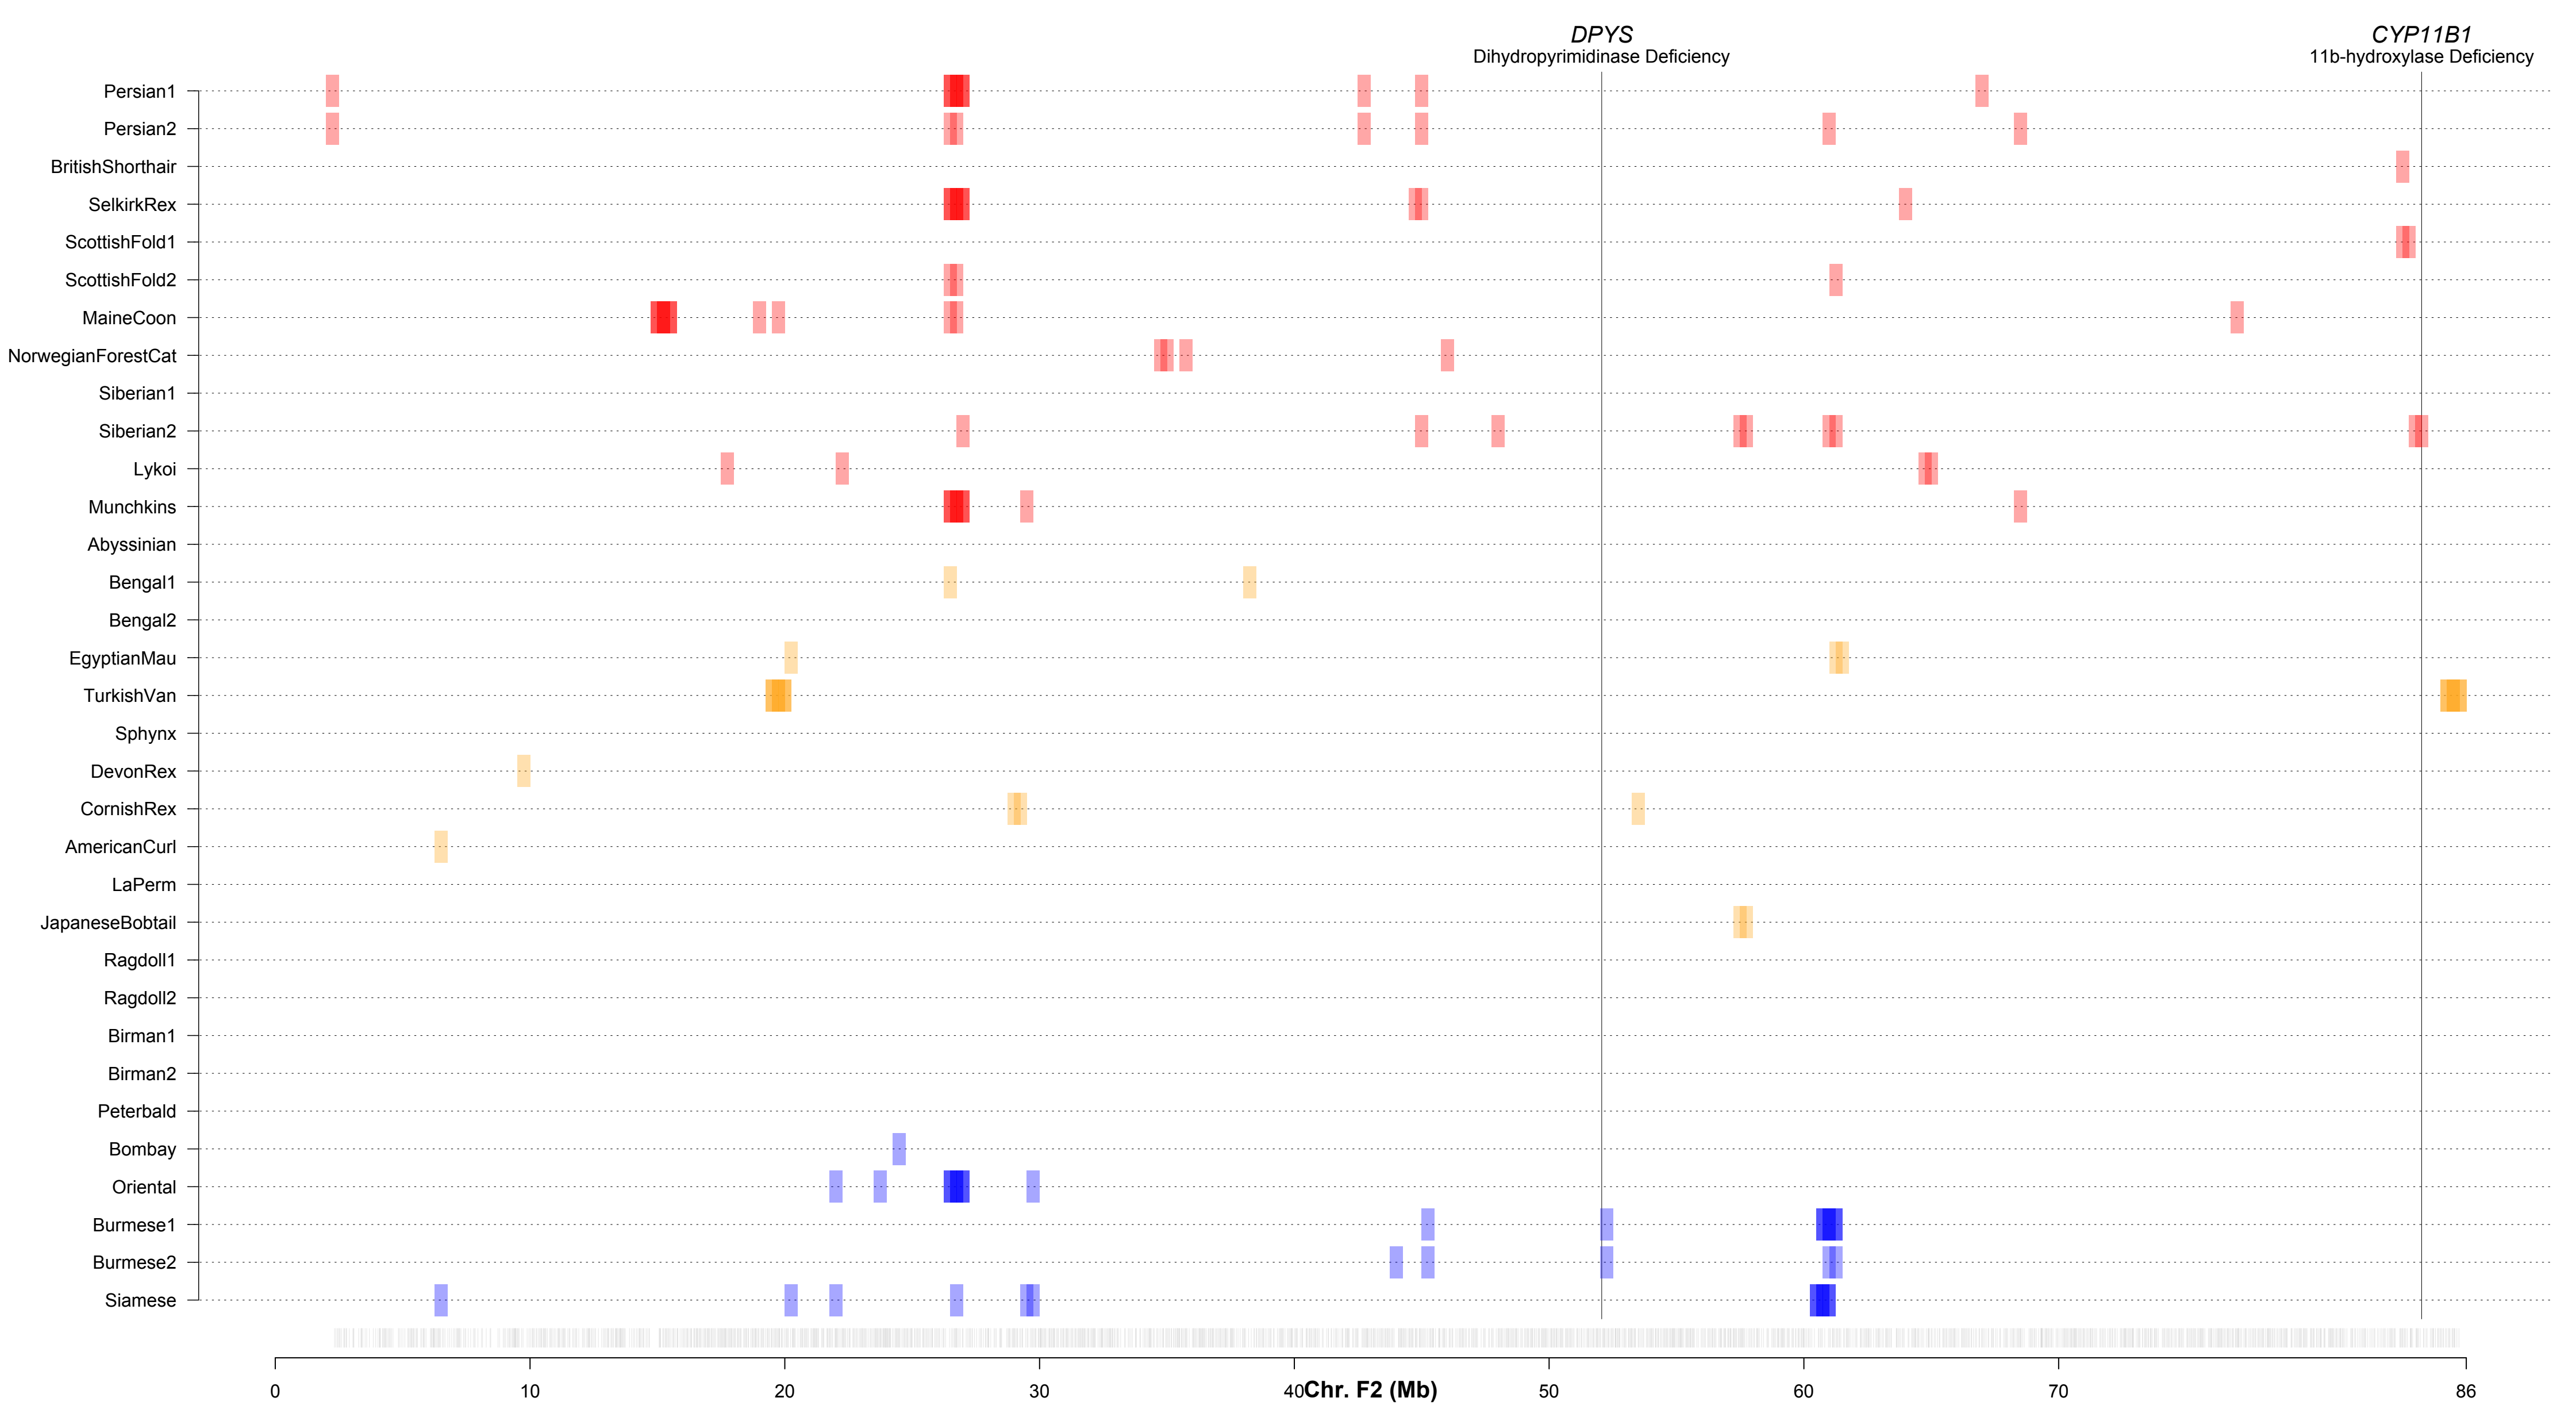

Supplement: pone.0247092.s001.pdf [file pone.0247092.s001.pdf]
